1 **Immunocapture of dsRNA-bound proteins provides insight into**  
2 **tobacco rattle virus replication complexes and reveals**  
3 **Arabidopsis DRB2 to be a wide-spectrum antiviral effector.**

4

5 Marco Incarbone<sup>1#</sup>, Marion Clavel<sup>1#</sup>, Baptiste Monsion<sup>1</sup>, Lauriane Kuhn<sup>2</sup>, Helene Scheer<sup>1</sup>,

6 Vianney Poignavent<sup>1</sup>, Patrice Dunoyer<sup>1</sup>, Pascal Genschik<sup>1</sup> and Christophe Ritzenthaler<sup>1\*</sup>

7

8

9 1. Institut de biologie de moléculaire des plantes, CNRS, Université de Strasbourg, France.

10 2. Plateforme protéomique Strasbourg Esplanade FR1589 du CNRS, Université de  
11 Strasbourg, Strasbourg, France.

12 # Current address: Gregor Mendel Institute of Molecular Plant Biology (GMI), Vienna,  
13 Austria.

14

15

16 \*Corresponding author

17 E-mail: [ritzenth@unistra.fr](mailto:ritzenth@unistra.fr) (CR)

18

19

20

21

22

23

24

25 **ABSTRACT**

26 Plant RNA viruses form highly organized membrane-bound virus replication complexes  
27 (VRCs) to replicate their genome and multiply. This process requires both virus- and host-  
28 encoded proteins and leads to the production of double-stranded RNA (dsRNA) intermediates  
29 of replication that trigger potent antiviral defenses in all eukaryotes. In this work, we describe  
30 the use of *A. thaliana* constitutively expressing GFP-tagged dsRNA-binding protein  
31 (B2:GFP) to pull down viral replicating RNA and associated proteins *in planta* upon  
32 infection with tobacco rattle virus (TRV). Mass spectrometry analysis of the dsRNA-  
33 B2:GFP-bound proteins from TRV-infected plants revealed the presence of (i) viral proteins  
34 such as the replicase, which attested to the successful isolation of VRCs, and (ii) a number of  
35 host proteins, some of which have previously been involved in virus infection. Among a set  
36 of nine selected such host candidate proteins, eight showed dramatic re-localization upon  
37 infection, and seven of these co-localized with B2-labeled TRV replication complexes,  
38 providing ample validation for the immunoprecipitation results. Infection of *A. thaliana* T-  
39 DNA mutant lines for eight of these factors revealed that genetic knock-out of the Double-  
40 stranded RNA-Binding protein 2 (DRB2) leads to increased TRV accumulation. In addition,  
41 over-expression of this protein caused a dramatic decrease in the accumulation of four  
42 unrelated plant RNA viruses, indicating that DRB2 has a potent and wide-ranging antiviral  
43 activity. We therefore propose B2:GFP-mediated pull down of dsRNA to be a novel and  
44 robust method to explore the proteome of VRCs *in planta*, allowing the discovery of key  
45 players in the viral life cycle.

46

47 **AUTHOR SUMMARY**

48 Viruses are an important class of pathogens that represent a major problem for human, animal  
49 and plant health. They hijack the molecular machinery of host cells to complete their



50 replication cycle, a process frequently associated with the production of double-stranded  
51 RNA (dsRNA) that is regarded as a universal hallmark of infection by RNA viruses. Here we  
52 exploited the capacity of a GFP-tagged dsRNA-binding protein stably expressed in transgenic  
53 Arabidopsis to pull down dsRNA and associated proteins upon virus infection. In this manner  
54 we specifically captured short and long dsRNA from tobacco rattle virus (TRV) infected  
55 plants, and successfully isolated viral proteins such as the replicase, which attested to the  
56 successful isolation of virus replication complexes (VRCs). More excitingly, a number of  
57 host proteins, some of which have previously been involved in virus infection, were also  
58 captured. Remarkably, among a set of nine host candidates that were analyzed, eight showed  
59 dramatic re-localization to viral factories upon infection, and seven of these co-localized  
60 dsRNA-labeled VRCs. Genetic knock-out and over-expression experiments revealed that one  
61 of these proteins, *A. thaliana* DRB2, has a remarkable antiviral effect on four plant RNA  
62 viruses belonging to different families, providing ample validation of the potential of this  
63 experimental approach in the discovery of novel defense pathways and potential biotech tools  
64 to combat virus infections in the field. Being compatible with any plant virus as long as it  
65 infects Arabidopsis, we propose our dsRNA-centered strategy to be a novel and robust  
66 method to explore the proteome of VRCs *in planta*.

67

## 68 **INTRODUCTION**

69 Viruses are obligate endocellular parasites that hijack their host's molecular processes and  
70 machinery to multiply, a process that sometimes results in devastating diseases. Pivotal to a  
71 successful infection is the efficient replication of the viral genomic nucleic acid(s). In the  
72 majority of plant virus species the genome consists of one or more molecules of single-  
73 stranded positive polarity RNA, or (+)ssRNA. Replication is carried out by the virus-encoded  
74 RNA-dependent RNA-polymerase (RdRp), often part of a larger protein known as the

75 replicase. This enzyme first copies the viral (+) genome into (-)ssRNA that is then used as a  
76 template for the production of progeny (+)ssRNA. Intrinsic to the RNA replication process is  
77 the generation of long double-stranded RNA (dsRNA) intermediates by the viral RdRp.  
78 The replication of all known (+) strand RNA virus takes place on host membranes whose  
79 origin, whether the endoplasmic reticulum, chloroplasts, mitochondria, peroxisomes etc...,  
80 depends on virus species (reviewed in [1-4]). The progressive virus-induced recruitment of  
81 such membranes generally leads to dramatic reorganizations of the host endomembrane  
82 system into so called “viral factories”. These viral factories are the sites where all steps vital  
83 to the virus life are carried out including protein translation, RNA encapsidation and RNA  
84 replication *sensu stricto*. The specialized molecular entities on which RNA replication occurs  
85 within the viral factories are known as the virus replication complexes (VRCs). While a  
86 minimal VRC arguably consists of single- and double-stranded viral RNA and replicase, their  
87 precise composition, which depends on the virus and host species, remains largely  
88 unexplored. A number of studies have shown that specific host proteins can be integral part  
89 of these VRC and exert positive (pro-viral) or negative (anti-viral) effects on replication. Our  
90 knowledge on these host proteins is summarized in several exhaustive reviews [5-7]. These  
91 include among others RNA-binding proteins, RNA helicases, chaperones and proteins  
92 belonging to the RNA interference machinery (RNAi, or RNA silencing), which is the  
93 primary response to replicating viruses in plants and other eukaryotes [7, 8].  
94 Antiviral RNAi against RNA viruses in the model plant *A. thaliana* is initiated by RNase-III  
95 Dicer-Like enzymes DCL4 and DCL2, which cleave dsRNA into 21- and 22-nt small-  
96 interfering RNA (siRNA), respectively. These siRNA are then loaded into Argonaute (AGO)  
97 proteins, which use them as templates to recognize and cleave viral ssRNA in a sequence-  
98 specific manner. Viruses have evolved a vast array of strategies to evade or block RNAi, the  
99 best studied of which are viral suppressors of RNA silencing (VSRs). These proteins

100 suppress silencing through a wide range of molecular strategies, from inhibition of dicing, to  
101 siRNA sequestration, to AGO degradation [9]. Of note, *A. thaliana* encodes several RNase-  
102 III-like enzymes (RTLs) in addition to Dicers, but little is known regarding their function  
103 [10]. The accumulation of viral dsRNA *in planta* varies widely among (+)ssRNA virus and  
104 host species, as we have recently shown [11]. While the precise molecular events occurring  
105 during virus RNA replication are often unclear, it can be argued that rapid and efficient  
106 separation of the (+) and (-) RNA strands could not only allow more replication cycles to take  
107 place, but also constitute a powerful mechanism of RNA silencing evasion/suppression  
108 through removal of dsRNA.

109 A great deal of our knowledge on plant virus VRCs emerged from a series of seminal studies  
110 conducted with *Tomato bushy stunt virus* (TBSV) on yeast, a surrogate host used as a  
111 powerful biological tool to conduct genetic screens and functional studies on host factors  
112 involved in TBSV VRC activity (reviewed in [12]). While the authors of these studies, where  
113 possible, validated the results obtained in yeast and *in vitro* on plant species *N. benthamiana*,  
114 data obtained *in planta* on VRCs of other viruses remains sparse. Recent studies have  
115 reported methods to spatio-temporally visualize VRCs *in vivo* via fluorescently labeled  
116 dsRNA-binding proteins [8, 11, 13]. Candidate-based, reverse genetic approaches have been  
117 used to probe the involvement of host factors in VRC formation and activity in plants [14,  
118 15]. These approaches, however, are necessarily based on prior discovery acquired by other  
119 experimental means. Another experimental strategy successfully used to characterize VRCs  
120 has been to pull down tagged viral proteins and analyze the resulting protein populations by  
121 mass spectrometry [16-18]. While this last method has provided valid and compelling data,  
122 we decided to investigate VRCs from a viral RNA-centered, rather than viral protein-  
123 centered, perspective. We hypothesized that pull-down of dsRNA from virus-infected plants

124 followed by mass spectrometry of dsRNA-associated proteins would provide insight into the  
125 molecular composition of VRCs.

126 To test this hypothesis, we used the eGFP-tagged dsRNA-binding domain of FHV protein  
127 B2, which we have previously used to efficiently detect viral dsRNA *in vitro* and in  
128 constitutively-expressing *N. benthamiana* [11]. *Arabidopsis thaliana* being more appropriate  
129 for genetic studies than *N. benthamiana*, we first generated transgenic *A. thaliana* Col-0  
130 plants stably expressing B2:GFP. We infected them with TRV, a well-studied (+)ssRNA  
131 virus, performed GFP immunoprecipitation and identified immunoprecipitated proteins by  
132 LC-MS/MS. In this manner, a number of virus- and host-encoded proteins could be  
133 identified. To validate their localization at B2:GFP-labeled TRV replication complexes, we  
134 tagged these candidates with tagRFP (tRFP hereafter) [19], transiently expressed them in  
135 healthy vs. TRV-infected 35S:*B2:GFP/N. benthamiana* [11] and observed the resulting leaf  
136 tissues by confocal laser scanning microscopy. We found that eight out of the nine *A.*  
137 *thaliana* proteins tested, including factors that have never before been linked to virus  
138 infection, re-localized strictly to B2:GFP-labeled TRV VRCs or alternatively to the larger  
139 TRV-induced viral factories. Among these candidates, DRB2, a dsRNA-binding protein was  
140 found to display antiviral activity. These results provide robust validation of dsRNA pull-  
141 down as an effective and high-throughput method for VRC characterization *in planta*.  
142 Furthermore, the results offer detailed snapshots of TRV replication complexes and viral  
143 factories, with host factors showing unique and distinct localization patterns in and around  
144 these complexes.

145

## 146 **RESULTS**

### 147 **B2:GFP-mediated isolation of tobacco rattle virus dsRNA from *A. thaliana***

148 The double-stranded RNA-binding B2:GFP protein, when ectopically expressed in transgenic  
149 35S:*B2:GFP/N. benthamiana*, has been previously shown to specifically associate with the  
150 VRCs of several positive-strand RNA viruses from plants and insects [11]. Following these  
151 findings, we wished to further exploit B2:GFP as a biochemical bait to explore the  
152 composition and biology of RNA VRCs, the pivotal element of which is dsRNA. To do so,  
153 and given the versatility of *A. thaliana* as a model plant species, we first produced  
154 homozygous 35S:*B2:GFP* transgenic plants. Although in this work we focused essentially on  
155 the 35S:*B2:GFP/Col-0* line, 35S:*B2:GFP* was also introduced into various genetic  
156 backgrounds including mutants of the core antiviral Dicer-Like genes, *dcl2-1*, *dcl4-2* and  
157 triple *dcl2-1/dcl3-1/dcl4-2* (**Supplementary Figure 1A,B,C**). The rationale behind this  
158 choice is that DCL proteins are arguably the best-known RNase III enzymes in plants, and  
159 the small-interfering RNA (siRNA) they generate from virus-derived dsRNA precursors are  
160 the effectors of RNA silencing, the main antiviral defense in plants [9, 20]. Similarly to the  
161 B2:FP *N. benthamiana* lines [11] and despite the clear expression of B2:GFP  
162 (**Supplementary Figure 1A**), the different lines showed little to moderate developmental  
163 phenotypes (**Supplementary Figure 1C**). These were very reminiscent of - but distinct from  
164 - those caused by ectopic expression of other RNA silencing suppressors such as P19 or HC-  
165 Pro [21, 22]. Such phenotypes may be determined (i) by inhibition of long dsRNA processing  
166 into siRNA or (ii) by disruption of miRNA function through their sequestration, or both.

167 The full-length FHV B2 protein has been shown to be a suppressor of RNA silencing [23,  
168 24], and proposed to act through both inhibition of dicing and sequestration of siRNA [25].  
169 To investigate whether the GFP-tagged 73 amino acid dsRNA binding domain of B2 that  
170 lacks the residues involved in the interaction with PAZ domains of Dicer proteins [26, 27]  
171 also acts as a suppressor of RNA silencing, we performed a standard GFP silencing patch test  
172 on *N. benthamiana* leaves (**Supplementary Figure 1D,E**). B2, as a C-terminal fusion to

173 tRFP (B2:tRFP) was able to suppress silencing of the GFP transgene, as was turnip crinkle  
174 virus suppressor P38. By contrast, a C44S, K47A double-mutated version of B2:tRFP  
175 impaired in dsRNA binding [11] was unable to suppress silencing, suggesting that  
176 suppression activity is dsRNA-binding-dependent and likely DCL-binding-independent.  
177 Next, we investigated the effects of stably expressed B2:GFP on endogenous small RNA  
178 pathways: biogenesis of microRNAs 159 and 160 was not perturbed in 35S:*B2:GFP/Col-0*  
179 plants, while biogenesis of siRNA such as endo-siRNA (IR71) and *trans*-acting siRNA  
180 (TAS1) was completely abolished (**Supplementary Figure 1B**). Whether these defects in  
181 endo-siRNA and *trans*-acting siRNA biogenesis are responsible of the observed  
182 developmental phenotypes remains to be determined.

183 We then infected 35S:*B2:GFP/Col-0* plants with a recombinant TRV carrying part of the  
184 phytoene desaturase (PDS) gene [28]. As expected, the control Col-0 plants showed minor  
185 viral symptoms and the typical bleaching phenotype linked to PDS gene silencing. In  
186 contrast, the B2:GFP-expressing plants showed no significant leaf discoloration but severe  
187 viral symptoms (**Figure 1A**) and death of the plants occurred before flowering (not shown),  
188 well in agreement with the efficient RNA silencing suppression activity of the B2 dsRNA-  
189 binding domain. Observation of systemically infected leaves by confocal microscopy showed  
190 TRV-induced re-localization of B2:GFP to distinct cytosolic mesh-like structures (**Figure**  
191 **1B**) very reminiscent to those observed in 35S:*B2:GFP/N. benthamiana* and shown to  
192 correspond to TRV-induced VRCs [11]. Northern analysis of RNA from TRV-PDS  
193 systemically infected 35S:*B2:GFP/N. benthamiana* and 35S:*B2:GFP/Col-0* revealed that  
194 B2:GFP caused a striking over-accumulation of viral (+)ssRNA in both plant species (**Figure**  
195 **1C**). This is also in agreement with B2:GFP activity as a suppressor of RNA silencing, and  
196 could be recapitulated in a *dcl2-1/dcl4-2* double mutant (*dcl24*), which lacks the two main  
197 antiviral Dicers (**Supplementary Figure 1F**)[29]. B2:GFP also caused a tremendous increase

198 in long double-stranded RNA content, likely corresponding to replication intermediates, as  
199 determined by northwestern blotting in both B2:GFP-expressing Col-0 and *N. benthamiana*  
200 plants (**Figure 1D**). In contrast, TRV-derived siRNA were differentially accumulated  
201 between Arabidopsis and *N. benthamiana*. Thus, while B2:GFP expression led to an overall  
202 reduction in 21 and 22 nt vsRNA species in Col-0 plants, the opposite effect was observed in  
203 *N. benthamiana* (**Figure 1E**). Conversely, miR159 and U6-derived snRNA accumulation was  
204 unaffected by the presence of B2:GFP in both plant species (**Figure 1E, Supplementary**  
205 **Figure 1B**). These results suggest that B2:GFP interferes strongly with TRV RNA processing  
206 by DCL enzymes, thereby promoting viral replication.

207 As a first experiment establishing B2:GFP as a tool to study VRC composition, we performed  
208 anti-GFP immunoprecipitations (IPs) from TRV-PDS-infected 35S:*B2:GFP*/Col-0 plants and  
209 analyzed their composition in (+)strand viral RNA (**Figure 1C**), long dsRNA (**Figure 1D**),  
210 siRNA (**Figure 1E**) and proteins (**Figure 1F**). As a negative control, we included TRV-PDS-  
211 infected 35S:*GFP*/Col-0 plants. Northern and northwestern analyses performed on IPed RNA  
212 revealed that immune complexes contained (+)ssRNA, long dsRNA and 22nt vsRNA, but no  
213 U6 and miR159 (**Figure 1C-E**). Interestingly, and in contrast with our previous report *in*  
214 *vitro* [11] but well in agreement with the capacity of B2 to bind dsRNAs longer than 18 bp  
215 [25], antiviral siRNA were immunoprecipitated (**Figure 1E**). Western analysis of proteins  
216 from the same experiment revealed efficient IP of both GFP and B2:GFP (**Figure 1F**).  
217 Altogether we concluded that immunoprecipitation allowed the isolation of TRV double-  
218 stranded replication intermediates, the core element of VRCs.

219

220 **Immunoprecipitation and identification of B2:GFP-associated viral and host proteins**  
221 **by mass spectrometry**

222 Once established that immunoprecipitation of B2:GFP from plants allowed efficient isolation  
223 of virus replication dsRNA intermediates, we wondered whether these complexes contain  
224 specific virus- and host-encoded proteins. To address this question we performed anti-GFP IP  
225 on TRV-PDS-infected 35S:*GFP*/Col-0 vs. 35S:*B2:GFP*/Col-0 in triplicate, and analyzed the  
226 immunoprecipitated proteins by mass spectrometry (MS). The complete list of identified viral  
227 and host proteins from this analysis is shown in **Supplementary Table 1**. We also performed  
228 the same IP and MS analysis on non-infected 35S:*GFP*/Col-0 vs. 35S:*B2:GFP*/Col-0 plants  
229 (**Supplementary Table 2**).

230 A preliminary analysis by immunoblot confirmed efficient and reproducible B2:GFP and  
231 GFP immunoprecipitation (**Supplementary Figure 2**), which could be confirmed by MS,  
232 reads from B2:GFP and GFP being the most abundant (**Figure 2A,B, Supplementary Table**  
233 **1**). We next searched and ranked accessions that were identified only - or highly enriched - in  
234 35S:*B2:GFP*/Col-0 samples (**Figure 2A,B, Supplementary Table 1**). As expected, the TRV  
235 replicase (Uniprot accession Q9J942) was among the most abundant proteins detected in  
236 immunoprecipitates from B2:GFP samples (**Figure 2**). This result, along with the previously  
237 described detection of viral dsRNA in analogous IPs (**Figure 1**), suggests that B2:GFP  
238 immunoprecipitation allows the isolation of TRV VRCs. This hypothesis is further supported  
239 by the detection of TRV coat protein (CP, Uniprot Q88897) and 16k suppressor of silencing  
240 (Uniprot Q77JX3) in B2:GFP immunoprecipitates (**Figure 2**). It also suggests that the 16k  
241 and CP associate directly or indirectly to dsRNA. Although unlikely, we can't at this point  
242 rule out that one or more of these TRV proteins bind B2:GFP and not dsRNA. In addition to  
243 TRV-encoded proteins, MS analysis allowed also the identification of 110 host proteins  
244 exclusively present in immunoprecipitates from B2:GFP-expressing plants (**Figure 2** and  
245 **Supplementary Table 1**), which we considered as replication complex-associated host



246 protein candidates. 29 of these proteins were significantly enriched in the IPs with an  
247 adjusted p-value < 0.05 (**Figure 2B**).

248 With the aim to evaluate the association of candidate host proteins to replication complexes  
249 and considering their high number (**Supplementary Table 1**), we first established a priority  
250 list of nine *A. thaliana* gene products that were either detected with high spectral counts  
251 (AT5G02500, AT3G09440, AT3G12580) or confirmed/potential RNA-binding/interacting  
252 proteins from literature or NCBI annotation (AT1G24450, AT5G04430 [30], AT3G62800  
253 and AT2G28380 [31]), or both (AT1G23410, AT3G45570)(**Figure 2A,B**). The distribution  
254 of peptide reads along these selected proteins, along with the TRV and bait proteins, is shown  
255 in **Figure 2C**. It should be noted that four of the candidates (AT1G23410, AT3G09440,  
256 AT5G02500 and AT3G12580) were also present in B2:GFP IPs from non-infected plants  
257 (**Supplementary Table 2**) which may reflect their dsRNA binding activity in both healthy  
258 and virus-infected plants. However, the spectral count of peptides from these proteins was a  
259 fraction of that detected in IPs from TRV-infected plants, despite the spectral counts of the  
260 bait proteins being comparable. All other candidates were not detected in B2 IPs from non-  
261 infected plants. Finally, we excluded from our priority list a number of proteins that were  
262 significantly enriched in B2:GFP vs. GFP plants due to the number of candidates to analyze  
263 and their apparent lack of significance in viral replication process based on literature. This  
264 includes for instance the most enriched protein, a myrosinase present in Brassica crops with  
265 anti-microbial activity and involved in defense against herbivores [32].

266

### 267 **tRFP does not label TRV replication complexes *in planta***

268 In a second step, we tested the subcellular localization of the selected candidates in relation to  
269 B2:GFP in healthy and TRV-infected plants. To do so, we opted for the 35S-driven transient  
270 expression of the Arabidopsis candidates as N- or C-terminal fusions to tRFP in healthy or

271 TRV-infected 35S:B2:GFP/*N. benthamiana*. In all cases, confocal imaging was performed 3-  
272 4 days post agro-infiltration, a time that was found to be optimal for TRV-infection and  
273 transient expression of protein candidates.

274 As an absolute prerequisite to our validation pipeline of candidate proteins and considering  
275 tRFP was used as reporter tag, we first carefully analyzed the intracellular distribution of  
276 tRFP with respect to TRV replication complexes in 35S:B2:GFP/*N. benthamiana*. As  
277 expected, tRFP as well as B2:GFP showed a typical nucleo-cytoplasmic localization in cells  
278 from healthy plants (**Figure 3A**), well in agreement with our previous report using the same  
279 experimental system [11]. Crucially, upon infection the intracellular distribution of tRFP  
280 remained unchanged, while B2:GFP concentrated to bright cytoplasmic cotton-ball-like  
281 structures often adjacent to the nucleus (**Figure 3B**). These large structures were previously  
282 shown to correspond to TRV viral factories enriched in mitochondria-derived membranes  
283 [11] on which replication of TRV is thought to occur [33]. Importantly, our data clearly show  
284 that while B2:GFP is highly enriched in TRV replication factories, tRFP alone is significantly  
285 depleted from these structures (**Figure 3B**), in agreement with the behavior of tRFP as  
286 cytoplasmic and validating tRFP as a reporter protein with which to tag the candidates of  
287 interest.

288

### 289 **Double-stranded RNA-binding proteins (DRBs) perfectly colocalize with B2-labeled** 290 **viral replication complexes**

291 DRBs are proteins with dual dsRNA-binding motifs with five representatives in the  
292 Arabidopsis genome [31, 34]. Despite showing low spectral counts in our IPs, two DRBs  
293 were identified in our analysis: DRB2 (AT2G28380, total counts: 4, **Figure 2A**) and DRB4  
294 (AT3G62800, total counts: 5, **Figure 2A**) that were obvious candidates to test (**Figure 4**).

295 DRB2 was recently shown to localize to the replication complexes of different RNA viruses  
296 [8], to be able to bind dsRNA [35] and to play a role in endogenous small RNA biogenesis  
297 [31, 36, 37]. In non-infected plants DRB2:tRFP and B2:GFP localized to partially  
298 overlapping cytoplasmic and nuclear structures. Interestingly, over-expression of DRB2  
299 changed the localization pattern of B2 from a predominantly nuclear localization (**Figure 3A**  
300 and [11]) to DRB2-labeled cytoplasmic structures as if B2:GFP was recruited to DRB2  
301 localization sites (**Figure 4A**). Remarkably, such redistribution of B2 was not observed upon  
302 overexpression of DRB4 (**Figure 4C**). Crucially, near-perfect colocalization of DRB2:tRFP  
303 and B2:GFP was observed in the VRCs upon TRV-PDS infection (**Figure 4A**), which was  
304 particularly evident at high magnification (**Figure 4B**). Moreover, while DRB2:tRFP was  
305 almost exclusively found in the cytoplasmic VRCs upon infection, a substantial fraction of  
306 B2:GFP remained associated to nuclear structures likely containing dsRNA (**Figure 4B**).  
307 This suggests that although both proteins are susceptible to bind dsRNA, their intracellular  
308 targeting is likely not exclusively dsRNA-dependent.

309 DRB4 has been shown to be both a co-factor of DCL4 in small RNA biogenesis and an  
310 inhibitor of DCL3 in endogenous inverted-repeat RNA processing in *A. thaliana* [38, 39].  
311 More relevantly here, DRB4 is involved in the defense against RNA viruses [40, 41]. When  
312 we expressed DRB4:tRFP in non-infected tissue, this protein accumulated predominantly to  
313 the nucleus where it colocalized with B2:GFP (**Figure 4C**), in agreement with previous  
314 reports [8, 11]. Upon TRV infection DRB4:tRFP was clearly redistributed to VRCs, where it  
315 perfectly colocalized with B2:GFP (**Figure 4C,D**). In contrast to DRB2 that was barely  
316 detectable in the nucleus (**Figure 4B**), a significant fraction of DRB4:tRFP remained nuclear  
317 upon infection (**Figure 4C,D**).

318 Altogether, the robust colocalization of both double-stranded RNA-binding proteins DRB2  
319 and DRB4 with B2:GFP during infection provide (i) further evidence that the TRV-viral

320 factories are indeed cytoplasmic dsRNA hotspots and, more importantly, (ii) a first validation  
321 of the immunoprecipitation procedure.

322

### 323 **Proteins previously linked to viral infection localize at/near VRCs**

324 A family of proteins that emerged with high spectral counts were those belonging to the  
325 HSP70 family: HSP70 (AT3G12580, 63 counts), HSP70-1 (or HSC70-1, AT5G02500, 81  
326 counts) and HSP70-3 (or HSC70-3, AT3G09440, 71 counts) (**Figure 2A**). Members of this  
327 family of chaperones have been shown in several studies to play key roles in virus infection  
328 cycles (reviewed in [5, 42]). They can regulate viral life cycles both positively and  
329 negatively, and depending on the virus, they affect VRC formation, virus movement and coat  
330 protein homeostasis, among other processes. Three recent studies showed that unrelated plant  
331 viruses hijack HSP70 to greatly enhance virus replication [43-45].

332 All three HSP70 members were tested in TRV-infected and non-infected *35S:B2:GFP/N.*  
333 *benthamiana* (**Figure 5 and Supplementary Figure 3**). When overexpressed in healthy  
334 plants HSP70:tRFP, HSP70-1:tRFP, HSP70-3:tRFP localized essentially to distinct  
335 cytoplasmic foci whose number, size and distribution were specific for each of the three  
336 HSP70 observed (**Supplementary Figure 3**). Remarkably, upon infection, HSP70-1:tRFP  
337 (**Figure 5B**) and HSP70-3:tRFP (**Figure 5C**) were clearly redistributed to TRV viral  
338 factories enriched in B2:GFP. In contrast, the localization pattern of HSP70:tRFP remained  
339 essentially unaffected upon infection, with no obvious colocalization of B2:GFP with  
340 HSP70:tRFP-labeled foci (**Figure 5A, Supplementary Figure 3A**).

341 It should be noted that despite the clear redistribution of HSP70-1:tRFP and HSP70-3:tRFP  
342 upon infection, only partial colocalization was detected between these proteins and B2:GFP  
343 (**Figure 5B,C**). The latter appeared engulfed in large HSP70-1 or HSP70-3-containing  
344 bodies, likely corresponding to larger viral factories. This sub-localization is in sharp contrast

345 with the near perfect colocalization of B2:GFP with DRB2 and DRB4 upon infection (**Figure**  
346 **4**). Altogether our results suggest that HSP70-1 and HSP70-3, contrarily to HSP70, are  
347 components of the TRV viral factories. However, contrarily to B2, DRB2 and DRB4 that  
348 directly interact with dsRNA, HSP70-1 and HSP70-3 are likely involved in indirect  
349 interactions with TRV replication complexes, perhaps via the TRV replicase or other viral or  
350 host components. Interestingly, it has recently been observed using the B2:GFP system that  
351 dsRNA-containing VRCs constitute only a part of the structures induced by PVX, which in  
352 fact also contain viral ssRNA and coat protein [11]. The components and activities harbored  
353 within these larger “viral factories” are still largely unknown, but the localization patterns of  
354 HSP70-1 and HSP70-3 suggests that these proteins associate not only to replication  
355 complexes but also to other entities within viral factories.

356 Next, we tested the localization of an RNA-binding protein present in our IP MS list that was  
357 previously shown to associate to plant virus RNA. This protein, known as Binding to ToMV  
358 RNA (BTR1, AT5G04430, 7 counts, **Figure 2A**), was identified through affinity purification  
359 of tagged viral RNA and found *in vitro* to bind to the 5' region of the (+) polarity RNA of  
360 ToMV, a tobamovirus [30]. In our experimental system, BTR1:tRFP localized to numerous  
361 cytoplasmic punctate structures at the cell periphery in non-infected cells (**Supplementary**  
362 **figure 3D**). Upon TRV-PDS infection, BTR1 was seen to clearly localize at B2:GFP-labeled  
363 VRCs, while to some extent maintaining the localization visible in non-infected cells  
364 (**Supplementary figure 3D**). At high magnification it is possible to see that BTR1 did not  
365 strictly and exclusively colocalize with B2:GFP, but could also be seen in the areas  
366 surrounding B2:GFP-labeled dsRNA hotspots (**Figure 5D**). Similarly to HSP70-1 and  
367 HSP70-3, it is possible that BTR1 associates not only to VRCs but also to other entities  
368 within viral factories.

369

### 370 **Novel proteins are localized at/near replication complexes**

371 Among the potential TRV replication complex-associated proteins identified through IP, we  
372 tested three on which we found no specific function in virus process from the literature: a  
373 RING/U-box protein (AT3G45570, 50 counts) and Ribosomal Protein S27a (AT1G23410, 82  
374 counts) and NFD2 (Nuclear Fusion Defective 2 – AT1G24450, 12 counts, **Figure 2A**).

375 The RING/U-box protein, which we will refer to as RUP1, belongs to the E3 ubiquitin ligase  
376 RBR family. The N-terminal half of the protein is homologous to the RNase H superfamily,  
377 followed on the C-terminal half by a RING-type zinc-finger domain and an IBR (In Between  
378 Ring fingers) domain. The Ribosomal Protein 27a, here abbreviated to RP27a, is a small  
379 protein of 156 aminoacids with a ubiquitin domain N-terminal half and a zinc-binding  
380 ribosomal protein superfamily C-terminal section. Importantly, all RP27a peptides detected  
381 in B2:GFP co-immunoprecipitated samples belong to the ubiquitin domain, and also match  
382 with the protein sequences of UBQ1 through UBQ14 (**Supplementary Figure 5**). This  
383 suggests ubiquitination of one or more proteins present in the immunoprecipitates that  
384 possibly associated to TRV replication complexes. To investigate which protein/s were  
385 ubiquitinated, we searched the mass spectrometry dataset for di-glycine footprints, a hallmark  
386 of ubiquitination. Interestingly, the only protein found to contain such a feature was RP27a  
387 itself, only on lysine-48 (**Supplementary Figure 5**), suggesting self-ubiquitination and/or the  
388 formation of lysine-48 polyubiquitin chains. Given that no other di-glycine footprint was  
389 found in our spectrometry dataset, the proteins targeted by these chains may have been below  
390 detection level and remain to be identified. Finally, NFD2 was first identified as a factor  
391 involved in karyogamy, the fusion of polar nuclei within the central cell of the female  
392 gametophyte prior to fecundation and the fusion of the sperm cells' nuclei with the egg cell  
393 and the central cell upon fecundation [46]. This protein, containing an RNase III domain, has  
394 been also described as RNase Three-Like 4 (RTL4) [10].

395 In healthy cells, tRFP-tagged RUP1 and RP27a displayed a nucleo-cytoplasmic distribution  
396 (**Supplementary Figure 4A,B**), while NFD2 was essentially found in numerous cytoplasmic  
397 bodies (**Supplementary Figure 4C**). Upon TRV infection, all three proteins were clearly re-  
398 localized to or near B2:GFP-labeled dsRNA hotspots (**Figure 6, Supplementary Figure 4**).  
399 More precisely, RUP1 and RP27a showed patterns similar to those observed with HSP70-1,  
400 with extensive overlap with B2:GFP as seen from the white color in the merged panels  
401 (**Figure 6A,B**). This suggests that RUP1 and RP27a associate not only with VRCs but also to  
402 other entities within viral factories. Interestingly, NFD2 showed a pattern of localization  
403 different from the other proteins tested in this work (**Figure 6C, Supplementary Figure 4C**).  
404 Although localization of NFD2 and B2 seemed mutually exclusive, NFD2 being absent from  
405 B2:GFP-labeled structures and vice versa, a continuum between B2:GFP-labeled hotspots  
406 and NFD2-labeled structures was observed (**Figure 6C**), suggesting that NFD2 is intimately  
407 linked to TRV-induced subcellular entities and was therefore immunoprecipitated. In  
408 addition, the complete localization of NFD2 in close proximity to TRV replication complexes  
409 was in stark contrast with the perinuclear and cytoplasmic point-form localization of NFD2 in  
410 non-infected plants (**Supplementary Figure 4C**).

411

#### 412 **Knock-out of DRB2 potentiates TRV systemic infection in a Dicer-independent manner**

413 Next, we tested whether genetic knock-out of the candidate genes analyzed would lead to  
414 changes in TRV systemic accumulation. To do so, we acquired *A. thaliana* lines with T-DNA  
415 insertions in the genes of interest: *drb2-1*, *drb4-1* and *drb2-1/drb4-1* [47], *btr1-1* [30],  
416 SALK\_078851 (*rup1*), SALK\_093933 (*rp27a*), SALK\_088253 (*hsp70*), SALK\_135531  
417 (*hsp70-1*) and SALK\_020290 (*hsp70-3*). No lines carrying insertions in the annotated 5'UTR  
418 or coding sequence of *NFD2* were found. We infected ten plants per genotype and harvested  
419 the inoculated leaves 3 days post-infection (dpi), dividing the plants of each genotype into

420 two equal pools. In parallel, an identical set of infections was performed, and systemically  
421 infected leaves were harvested 12 dpi. Northern blot analysis of the total RNA from these  
422 samples revealed that, while there were no noticeable changes in TRV RNA accumulation in  
423 the inoculated leaves at 3dpi (**Figure 7A**), both the single *drb2-1* and double *drb2-1/dr4-1*  
424 mutants showed markedly increased TRV accumulation in systemic leaves compared to  
425 control Col-0 plants at 12 dpi (**Figure 7B**). This suggests that DRB2 could play an antiviral  
426 function with respect to TRV. A moderate increase in TRV accumulation was also observed  
427 in systemic leaves of *btr1-1* mutants, in agreement with published work on ToMV [30]  
428 (**Figure 7B**). Considering that major differences in TRV accumulation between SALK lines  
429 and Col-0 control were essentially restricted to *drb2-1* and *drb2-1/dr4-1* lines, we decided to  
430 focus our attention on possible antiviral function of DRB2. Since DRB proteins have been  
431 shown by several studies to be involved in small RNA biogenesis [35 , 37 , 38, 39 , 40 ] and  
432 DRB2 genetic knock-out has been shown to impact accumulation of several microRNAs  
433 [36], we decided to analyze the viral siRNA (vsiRNA) present in the *drb* mutants described  
434 above (**Figure 7C**). Northern blot analysis of small RNAs revealed an increase in vsiRNA in  
435 the *drb2-1* and *drb2-1/dr4-1* mutants analyzed. This most likely reflects the increase in TRV  
436 genomic RNAs in these samples (**Figure 7B**), which are substrates for vsiRNA biogenesis.  
437 Moreover, DRB2 knock-out didn't cause any noticeable changes in the vsiRNA size  
438 distributions. These observations, overall, lead us to conclude that knock-out of DRB2 (i)  
439 positively impacts TRV RNA and vsiRNA steady-state levels and (ii) does not cause changes  
440 in the respective contributions of DCL2, DCL3 and DCL4 to this process. These observations  
441 are in line with what has been previously observed for TuMV and TSWV [47]. Therefore, the  
442 increase of TRV systemic accumulation observed in *drb2* mutants is likely not due to  
443 impaired dicing activity, a step upstream in the RNA silencing pathway that is normally  
444 associated to DRB proteins.



445

446 **DRB2 over-expression drastically reduces the accumulation of various plant RNA**  
447 **viruses**

448 The absence DRB2 resulting in increased TRV accumulation (**Figure 7**), we next tested  
449 whether AtDRB2 over-expression could negatively impact infection by TRV and possibly by  
450 other distantly-related RNA viruses. To this end, agro-infiltrated *N. benthamiana* leaves  
451 transiently expressing DRB2:tRFP or tRFP were mechanically inoculated with the viruses of  
452 interest, and three days after infection leaf disks were collected. Northern blot analysis  
453 revealed that in tissues infected by TRV-PDS (**Figure 8A**), tomato bushy stunt virus (TBSV,  
454 **Figure 8B**), potato virus X (PVX, **Figure 8C**) and grapevine fanleaf virus (GFLV, **Figure**  
455 **8D**), over-expression of DRB2:tRFP lead to a dramatic decrease in virus accumulation  
456 compared to over-expression of tRFP alone. This effect was particularly prominent for  
457 TBSV, PVX and GFLV, despite the presence of comparable amounts of DRB2:tRFP (**Figure**  
458 **8E**). Remarkably, confocal microscopy of B2:GFP-expressing *N. benthamiana* leaves  
459 transiently over-expressing DRB2:tRFP and infected with TBSV showed that DRB2:tRFP  
460 co-localizes with VRCs (**Figure 8F**) that are structurally very different from those produced  
461 upon TRV infection (**Figure 4B**). To confirm that these are indeed TBSV VRCs, which are  
462 known to form on peroxisome membranes [12], we generated a clone to express a tRFP-SKL  
463 peroxisome marker [48]. Expression of this marker in B2:GFP-expressing *N. benthamiana*  
464 leaves subsequently infected with TBSV reveal that B2-labeled VRCs are indeed localized on  
465 the surface of peroxisomes, that in infected conditions appear to group into large multi-  
466 peroxisome clusters (**Figure 8G**). These results clearly show that AtDRB2 localizes to VRCs  
467 from different viruses and is a broad-ranged and potent antiviral effector.

468

469 **DISCUSSION**

470

471 We have here provided a description of a novel approach toward the identification of VRC-  
472 associated proteins through the isolation of replicating viral dsRNA during genuine infection,  
473 and validated the localization of most of the candidates through a rapid, robust and simple  
474 system. We also showed that one of the proteins we identified as associated to viral dsRNA,  
475 DRB2, has antiviral activity against several RNA viruses that belong to different families  
476 including *Secoviridae* (GFLV), *Virgaviridae* (TRV), *Tombusviridae* (TBSV) and  
477 *Alphaflexiviridae* (PVX). Although the proof of concept for our approach to identify VRC-  
478 associated proteins is established here only for TRV, it should be compatible with any plant  
479 virus as long as it is able to produce dsRNA during its replication cycle. Importantly, it does  
480 not involve as a prerequisite any modification of viral genomes, the production of infectious  
481 clones or the specific tagging of viral protein. Also, considering that the isolation of viral  
482 dsRNA and associated proteins is achieved indirectly by anti-GFP antibodies, there is no  
483 requirement for virus- or dsRNA-specific antibodies in the process. Hopefully this  
484 experimental approach will provide future investigators with a universal tool to successfully  
485 explore the proteome associated to the replication complexes of their favorite RNA virus,  
486 which can then be studied more in detail to discover the function of VRC-associated proteins  
487 and their involvement in the viral life cycle. As hosts, 35S:B2:GFP/*A. thaliana* (this study)  
488 and 35S:B2:GFP/*N. benthamiana* [11] are compatible with numerous plant virus species. If  
489 needed, the systems could be easily adapted to other plant species, as long as they  
490 accommodate stable transformation.

491 We have shown that ectopic expression of B2:GFP greatly increases the accumulation of  
492 TRV RNA both in *A. thaliana* and *N. benthamiana*. Given the activity of the 73 amino-acid  
493 double-stranded binding domain of B2 as a VSR (this work), it is tempting to ascribe TRV  
494 over-accumulation simply as a consequence of RNA silencing suppression and subsequent

495 enhanced viral replication. While this is very probably the case, it cannot be excluded that  
496 B2:GFP increases TRV accumulation by RNAi-independent means, such as stabilization of  
497 dsRNA or its protection from other host defensive pathways [49]. Preliminary data also  
498 suggest that enhanced viral replication may not be restricted to TRV but likely applies to  
499 other RNA virus (Ritzenthaler, unpublished).

500 The drastic effect of B2:GFP on TRV infection can be viewed as a double-edged sword in  
501 relation to its use as bait to pull down VRCs. On one hand, this effect may introduce biases of  
502 both quantitative and qualitative nature, such as the unspecific association to VRCs of host  
503 proteins that do not play a role during infection in wild-type conditions or changes in the  
504 accessibility or protein complement of replicating RNA, for example. On the other hand, the  
505 over-accumulation of TRV dsRNA constitutes a real advantage for the study of VRCs. In  
506 fact, increased viral replication is in favor of (i) a better immunoprecipitation efficiency, (ii)  
507 an enhanced detection of protein partners by mass spectrometry and (iii) an improved  
508 visualization of VRCs with test candidates. While these biases clearly need to be taken into  
509 account, we strongly believe that overall this approach has far more advantages than  
510 drawbacks.

511 The abundance of TRV replicase detected in the IPs (624 reads, Figure 2A) is, in our opinion,  
512 confirmation of the robustness of the experiment in terms of VRC yield and integrity. The  
513 abundant detection of the coat protein suggests that it either plays a direct role in TRV  
514 replication or that the VRCs present in the IPs contain not only full-length dsRNA, but also  
515 (+)ssRNA that is being encapsidated, possibly during or just after separation from the (-)  
516 strand. However, despite the use of detergent during the IPs, it is possible that we have pulled  
517 down proteins present on membranes or complexes close to the replication organelles but not  
518 actually part of them.

519 Remarkably, among the nine candidate *A. thaliana* proteins detected following B2 IP and  
520 tested in this work, only one, HSP70, failed to accumulate in VRCs despite a high spectral  
521 count. HSP70 has been linked to viral infection in a number of studies [5, 42] and found to  
522 directly bind the viral replicase of at least two viruses [50, 51]. It is possible that the tRFP  
523 could have disrupted the function of the protein. Another possibility is that the *A. thaliana*  
524 HSP70 (AT3G12580) may not be fully functional when expressed in the heterologous host *N.*  
525 *benthamiana*.

526 All remaining 8 candidates were specifically redistributed upon infection, suggesting  
527 involvement of these factors in the viral life cycle. Their localization patterns can be divided  
528 into three groups: perfect co-localization (DRB2 and DRB4), partial co-localization (HSP70-  
529 1, HSP70-3, BTR1, RUP1 and RP27a) and proximity (NFD2).

530 Perfect co-localization most likely reflects the direct association of DRB2 and DRB4 on  
531 replicating dsRNA within the VRCs. This result is in line with the experimentally verified  
532 ability of DRB2 and DRB4 to bind dsRNA [35, 52] and of DRB4 to bind TYMV dsRNA *in*  
533 *vivo* [40]. DRB2 was recently shown in *A. thaliana* to re-localize to cytoplasmic punctate  
534 bodies upon infection by TuMV, TSWV and TYMV [8] and DRB4 to re-localize from nuclei  
535 to cytoplasmic VRCs upon TYMV infection [40]. While DRB4 plays a role in antiviral  
536 defense [40, 41] as part of the RNA silencing machinery, the function of DRB2 recruitment  
537 to replication complexes remains to be uncovered. Although additional experiments are  
538 required to confirm the direct association of DRB2 and DRB4 to TRV replicating dsRNA  
539 and DRB2 to TBSV replicating dsRNA, our data suggest that host proteins including  
540 antiviral defense protein such as DRBs may have access to viral dsRNA within replication  
541 organelles including TBSV-induced spherules. This potentially questions the suggested  
542 function (or at least efficiency) of replication organelles as protective structures against  
543 degradation by cellular RNases and detection by putative dsRNA sensors that trigger antiviral

544 responses [12, 53, 54]. It is conceivable that B2:GFP and the DRB proteins gain access to  
545 viral dsRNA at early stage of replication organelle morphogenesis before replication  
546 complexes become eventually fully protected.

547 While the precise molecular pathways linking DRB2 to VRCs remain to be uncovered, we  
548 have shown through genetic ablation and over-expression that this protein is a key element in  
549 the host's restriction of viral systemic infection. We have also shown that the antiviral  
550 activity of DRB2 likely does not involve Dicer function, since viral siRNA production  
551 remains unchanged upon knock-out of DRB2. Our data, however, does not rule out a possible  
552 involvement of DRB2 in steps of the RNA interference pathway that are downstream of  
553 Dicer processing. Whatever the molecular mode of action of DRB2, our over-expression  
554 experiments have shown that heightened production of this protein *in planta* drastically  
555 reduces the accumulation of viruses belonging to various families. Therefore, we believe that  
556 further study of DRB2 and its use as a biotech tool in crop defense against viral infection  
557 hold substantial potential.

558 The pattern of partial co-localization, observed for HSP70-1, HSP70-3, BTR1, RUP1 and  
559 RP27a/Ubiquitin, consisted in the localization at the B2-labeled VRCs *per se*, as well as  
560 features in close proximity, generally designated as “viral factories”. In the case of PVX, the  
561 dsRNA-containing replication complexes reside within larger viral factories harboring other  
562 viral proteins and viral ssRNA [11]. In general, these viral factories are most likely the hub  
563 for a plethora of viral activities beyond RNA replication *sensu stricto*, such as translation,  
564 encapsidation, etc..., and which likely require specific host-encoded proteins. Our work  
565 suggests that HSP70-1, HSP70-3, BTR1, RUP1 and RP27a/Ubiquitin may play such  
566 functions during replication of TRV and possibly other viruses. Indeed, HSP70-3 and BTR1  
567 have been shown to interact with TuMV replicase [16] and ToMV ssRNA [30], respectively.  
568 Similarly, ubiquitin and the ubiquitin pathway have been shown in a number of studies to

569 play important roles in plant virus life cycle, both pro-viral and anti-viral, the details of which  
570 are exhaustively reviewed in [55, 56]. Finally concerning NFD2, the pattern of proximity  
571 suggests that this protein may indirectly be involved in viral factory function without directed  
572 association with viral dsRNA per se. The fact that genetic knock-out of most of these factors  
573 did not lead to drastic changes in viral RNA accumulation (with the notable exception of  
574 DRB2) does not rule out their involvement in viral functions despite their localization to  
575 VRCs. They could act redundantly with other proteins, or could affect parameters that do not  
576 perturb viral RNA accumulation, to name but a few possibilities. The genetic dissection of  
577 the roles played by the proteins here identified, through experiments including IP and mass  
578 spectrometry of tagged alleles of these factors in different genetic backgrounds, is outside the  
579 scope of this manuscript and will be addressed in further studies.

580

## 581 **MATERIALS AND METHODS**

582

### 583 **Golden Gate pEAQ $\Delta$ P19 vector construction**

584 Binary vector pEAQ $\Delta$ P19-GG was obtained by, (i) removing 3 SapI restriction sites present  
585 in pEAQ-*HT* [57], (ii) inserting a Golden Gate cassette (similar to Gateway without AttR1/2)  
586 with SapI sites at extremities and (iii) removing P19. Two silent substitutions into Neomycin  
587 phosphotransferase (*nptII*) gene and one substitution near the origin of replication (*ColE1*)  
588 were produced by PCR mutagenesis using Phusion polymerase in GC buffer supplemented  
589 with 5% DMSO (primers in **Supplementary Table 3**, n°595-596 and 638-641) in order to  
590 obtain plasmid pEAQ-*HT*- $\Delta$ SapI. A Golden Gate cassette amplicon (pEAQ-*HT* as matrix, see  
591 primer n°589+642 **Supplementary Table 3**) was inserted via AgeI/XhoI restriction sites in  
592 pEAQ-*HT*- $\Delta$ SapI. Finally, P19 was excised by double restriction EcoNI/SgsI (FD1304,  
593 FD1894, Thermo Scientific), extremities were filled in with Klenow fragment (EP0051,

594 Thermo Scientific), supplemented with dNTPs, followed by a ligation step and  
595 transformation in *E. coli* (ccdB Survival strain, Invitrogen).

596

### 597 **Plant material**

598 Transgenic 35S:B2:GFP/*N. benthamiana* plants were previously described [11]. Transgenic  
599 *A. thaliana* plants (Col-0 line and genetic backgrounds including mutants of the core antiviral  
600 Dicer-Like genes, *dcl2-1*, *dcl4-2* and triple *dcl2-1/dcl3-1/dcl4-2* lines - [29] expressing  
601 35S:B2:GFP were generated using same plasmid (pEAQΔP19-B2:GFP) and agrobacteria  
602 described in [11], following floral dip transformation [58] with addition of PPM (Plant  
603 Preservative Mixture, Plant Cell Technology) at 2 ml/L in MS medium. Individual  
604 Arabidopsis transformed lines were self-pollinated to generate (F3) plants homozygous for  
605 the transgene.

606

### 607 **Cloning of candidate genes**

608 Candidate genes were amplified from *A. thaliana* genomic DNA with primers designed to  
609 contain SapI restriction sites compatible with Golden Gate cloning [59] and adapters  
610 necessary for ligation to an N-terminal or C-terminal tag (primer list in **Supplementary**  
611 **Table 3**). In the case of genes containing SapI restriction sites, silent mutations were  
612 introduced to remove these sites through overlap PCR. In parallel, tRFP was amplified with  
613 primers designed to contain SapI restriction sites, adapters for ligation to the N- or C-terminal  
614 end of the candidate gene and a peptide linker (GGGSGGG amino acid sequence) between  
615 tRFP and the candidate gene. tRFP-SKL was generated by adding the bases to encode the  
616 SKL tripeptide in the reverse primer before the stop codon. PCR products were purified from  
617 agarose gel and used in a Golden Gate reaction containing the candidate gene, tRFP, binary  
618 vector pEAQΔP19-GG, SapI (R0569L, New England Biolabs), CutSmart buffer (New

619 England Biolabs), T4 DNA ligase 5U/ $\mu$ l (EL0011, Thermo Scientific) and 0.5 or 1 mM ATP  
620 (R0441, Thermo Scientific). Golden Gate reaction cycling: 10 cycles of 37°C 10 min, 18°C  
621 10 min ; 18°C 50 min, 50°C 10 min, 80°C 10 min. Following transformation in *E. coli*  
622 (TOP10 strain, Invitrogen), purification and sequencing, plasmids were transformed into *A.*  
623 *tumefaciens* strain GV3101. pEAQ $\Delta$ P19-B2:RFP served as matrix to generate plasmid  
624 pEAQ $\Delta$ P19-B2mut:RFP as described in [11](primers n°631-632, **Supplementary Table 3**).

625

### 626 **Plant inoculation and infection**

627 For fluorescence microscopy experiments, leaves of 5-6 week-old 35S:B2:GFP/*N.*  
628 *benthamiana* were infiltrated with *A. tumefaciens* GV3101 carrying plasmid pEAQ $\Delta$ P19  
629 containing the tagged gene of interest, at absorbance<sub>600nm</sub> ( $A_{600}$ ) of 0.2. Prior to inoculation,  
630 bacteria were incubated in 10 mM MES pH 5.6, 10 mM MgCl<sub>2</sub>, 200  $\mu$ M acetosyringone for 1  
631 hour. TRV infection was initiated upon agro-infection with bacteria carrying plasmids  
632 expressing the two viral genomic RNAs [28], at  $A_{600}$  0.01 each. This method of virus  
633 delivery was chosen because it results in homogenous and ubiquitous infection throughout  
634 the inoculated tissue. 3-4 days post-inoculation, leaf disks were collected and observed by  
635 confocal microscopy. *A. thaliana* infection was carried out as for *N. benthamiana*, with the  
636 difference that *A. tumefaciens* was induced by incubating 5-6 hours in induction medium  
637 (10.5 g/L K<sub>2</sub>HPO<sub>4</sub>, 4.5 g/L KH<sub>2</sub>PO<sub>4</sub>, 1 g/L (NH<sub>4</sub>)<sub>2</sub>SO<sub>4</sub>, 0.5 g/L sodium citrate, 0.1 g/L  
638 MgSO<sub>4</sub>, 0.4% glycerol, 0.1 g/L MES, 200  $\mu$ M acetosyringone), and bacteria used at  $A_{600}$  0.5  
639 each. Systemically infected leaves were harvested 12-13 dpi.

640 For the experiments shown in Figure 8, virus infection was carried out by rub inoculation: the  
641 day following agro-infiltration with 35S:*tRFP*, 35S:*tRFP-SKL* or 35S:*DRB2:tRFP*, the  
642 abaxial side of the infiltrated leaves was mechanically inoculated. The inoculum was  
643 obtained by grinding frozen *N. benthamiana* tissues infected with TBSV, TRV-PDS, PVX-



644 GFP or GFLV in 50 mM sodium phosphate buffered at pH 7 (except for TBSV, at pH 5.8).  
645 *N. benthamiana* plants were kept in a greenhouse at 22-18°C, 16h/8h light/dark photoperiod,  
646 while *A. thaliana* were kept in a neon-lit growth chamber at 22-18°C, 12h/12h light/dark  
647 photoperiod.

648

### 649 **Immunoprecipitation**

650 Immunoprecipitations were performed as previously described [21], with minor  
651 modifications. 0.15 g of young rosette leaves were ground in liquid nitrogen, homogenized in  
652 a chilled mortar with 1 ml lysis buffer (50 mM Tris-HCl, pH 8, 50 mM NaCl, 1% Triton X-  
653 100) containing 1 tablet/50 ml of protease inhibitor cocktail (Roche), transferred to a tube and  
654 incubated for 15 min at 4°C on a wheel. Cell debris was removed by two successive  
655 centrifugations at 12000g for 10 min at 4°C, after which an aliquot of supernatant was taken  
656 as input fraction. The remaining extract was incubated with magnetic microbeads coated with  
657 monoclonal anti-GFP antibodies ( $\mu$ MACS purification system, Miltenyi Biotech, catalog  
658 number #130-091-125) at 4°C for 20 min. Sample was then passed through M column  
659 (MACS purification system, Miltenyi Biotech) and an aliquot of the flow-through fraction  
660 was taken. The M column was then washed 2 times with 500  $\mu$ l of lysis buffer and 1 time  
661 with 100  $\mu$ l of washing buffer (20 mM Tris-HCl, pH 7.5). The beads and associated immune  
662 complexes were recovered by removing the M column from the magnetic stand and passing 1  
663 ml Tri Reagent (for subsequent RNA analysis – see dedicated section) or 200  $\mu$ l hot 1X  
664 Laemmli buffer (for protein analysis – see dedicated section). 4X Laemmli buffer was added  
665 to input and flow-through fractions before protein denaturation for 5 min at 95°C.

666

### 667 **RNA extraction and analysis**

668 RNA from total and immunoprecipitated fractions was performed with Tri-Reagent (Sigma)  
669 according to manufacturer's instructions. Briefly, 0.2 g tissue were ground in liquid nitrogen  
670 and homogenized in 1 ml Tri-Reagent, 400  $\mu$ l of chloroform were added, and sample was  
671 thoroughly shaken for 2 min. After 10 min spin at 13000 rpm, 4°C, supernatant was added to  
672 at least 1 vol isopropanol (and 1.5  $\mu$ l glycogen in the case of immunoprecipitated samples -  
673 IP) and incubated 1 hour on ice (O/N for IP). After 15 min spin at 13000 rpm, 4°C (30 min  
674 for IP), pellet was washed in 80% ethanol, dried and resuspended in water. RNA was  
675 analyzed by northern blot (denaturing agarose gel to detect high molecular weight RNA,  
676 denaturing PAGE to detect low molecular weight RNA) and northwestern blot (native  
677 agarose gel to detect long double-stranded RNA). In northern blot, miRNA were detected  
678 through DNA oligonucleotides labeled with  $\gamma$ -<sup>32</sup>P-ATP using T4 PNK (see **Supplementary**  
679 **Table 3**). TRV genomic and subgenomic RNAs were detected in the same way, with an  
680 oligonucleotide complementary to a part of the 3'UTR sequence common to RNA1 and  
681 RNA2. The same was done for TBSV. TRV-PDS-derived siRNA were detected through  
682 PCR-amplified *A. thaliana* PDS sequence labeled by random priming reactions in the  
683 presence of  $\alpha$ -<sup>32</sup>P-dCTP. The same was done to detect PVX and GFLV RNA in Northern  
684 blot. In northwestern blot, dsRNA were detected through recombinant Strep-Tagged FHV  
685 B2, as previously described [11].

686

### 687 **Protein extraction and analysis**

688 Proteins from total fractions were extracted as previously described [60]. Immunoprecipitated  
689 proteins for mass spectrometry analysis were isolated as described above, then denatured 5  
690 min at 95°C. Immunoprecipitated proteins from RNA IP were obtained by collecting the  
691 phenolic phase following Tri-reagent/chloroform extraction, adding 3-4 vol acetone and  
692 incubating at -20°C O/N. After centrifugation (13000 rpm, 15 min, 4°C) pellet was washed in

693 80% acetone and resuspended in 1X Laemmli. Proteins were resolved by SDS-PAGE and  
694 electro-blotted onto Immobilon-P membrane. This was incubated with the appropriate  
695 antibodies (anti-GFP polyclonal antibody and anti-tRFP antibody, Evrogen, reference #  
696 AB233) and revealed with Roche LumiLight ECL kit after incubation with secondary  
697 antibody.

698

### 699 **Mass spectrometry analysis and data processing**

700 Proteins were digested with sequencing-grade trypsin (Promega) and analyzed by nanoLC-  
701 MS/MS on a TripleTOF 5600 mass spectrometer (Sciex, USA) as described previously [61].  
702 Data were searched against the TAIR v.10 database with a decoy strategy (27281 protein  
703 forward sequences). Peptides were identified with Mascot algorithm (version 2.5, Matrix  
704 Science, London, UK) and data were further imported into Proline v1.4 software  
705 (<http://proline.profiroteomics.fr/>). Proteins were validated on Mascot pretty rank equal to 1,  
706 and 1% FDR on both peptide spectrum matches (PSM score) and protein sets (Protein Set  
707 score). The total number of MS/MS fragmentation spectra was used to quantify each protein  
708 from at least three independent biological replicates. A statistical analysis based on spectral  
709 counts was performed using a homemade R package as described in [62]. The R package  
710 uses a negative binomial GLM model based on EdgeR [63] and calculates, for each identified  
711 protein, a fold-change, a p-value and an adjusted p-value corrected using Benjamini-  
712 Hochberg method.

713

### 714 **Confocal laser scanning microscopy**

715 Observations of leaf disks were carried out using Zeiss LSM700 and LSM780 laser scanning  
716 confocal microscopes. eGFP was excited at 488 nm, while tRFP was excited at 561 nm.

717 Image processing was performed using ImageJ/FIJI, while figure panels were assembled with  
718 Adobe Photoshop.

719

## 720 **DATA AVAILABILITY**

721 All data are available in the manuscript and in Supplementary files. Raw data from gels and  
722 blots can be found with the Blotting Source Data file. Additional confocal acquisitions for  
723 each candidate tested can be found in the Microscopy Source Data file. Raw/unprocessed  
724 confocal images (.lsm format) and mass spectrometry data used to assemble all figures have  
725 been deposited in the public repository Zenodo. They can be accessed at the DOI: TO BE  
726 GENERATED.

727

## 728 **ACKNOWLEDGEMENTS**

729 We thank David Gilmer for providing anti-GFP (Rocco) polyclonal antibodies. Special  
730 thanks to H el ene Zuber for the R-script that enabled the statistical analysis of co-IP  
731 experiments. We also would like to thank Philippe Hammann for assistance in  
732 immunoprecipitation experiments, and Jerome Mutterer and Mathieu Erhardt for assistance in  
733 laser confocal microscopy.

734

## 735 **FUNDING**

736 Funding Disclosure: This work was co-funded by the CNRS and the European Regional  
737 Development Fund (ERDF) in the framework of the INTERREG IV and V Upper Rhine  
738 programs (BACCHUS and VITIFUTUR projects). B.M. benefited from an IdEx postdoctoral  
739 fellowship from the Universit e de Strasbourg. M.C. benefited from the European Research  
740 Council under the European Union's Seventh Framework Programme (FP7/2007-2013) /

741 ERC advanced grant to PG agreement n°[338904]. M.I. and M.C. also benefited from funds  
742 from LABEX: ANR-10-LABX-0036\_NETRNA.

743

#### 744 **COMPETING INTERESTS**

745 The authors declare that the research was conducted in the absence of any commercial or  
746 financial relationships that could be construed as a potential conflict of interest.

747

#### 748 **AUTHOR CONTRIBUTIONS**

749 Study conception and design: M.I. and C.R.; generation of transgenic *A. thaliana* lines: B.M.;  
750 immunoprecipitation experiments: M.I.; RNA and protein extraction, northern and north-  
751 western blotting: M.I. and M.C.; western blotting: M.I., M.C. and H.S.; mass spectrometry:  
752 L.K.; statistical analysis of co-IP data: L.K. and H.S.; molecular cloning: M.I., B.M. and  
753 V.P.; recombinant B2 production: V.P.; *N. benthamiana* inoculation and infection: M.I. and  
754 M.C.; laser confocal microscopy: M.I.; data analysis: M.I., M.C., B.M., L.K., H.S., V.P., P.D.  
755 P.G., C.R. writing: M.I. and C.R.; supervision: C.R.; funding acquisition: C.R., P.G. and P.D.

756

#### 757 **FIGURE LEGENDS**

758

759 **Figure 1: Immunoprecipitation of B2:GFP allows the isolation of TRV dsRNA *in vivo*.**

760 **(A)** Photos of *A. thaliana* Col-0 and 35S:B2:GFP/Col-0 plants 13 days post-infection with  
761 TRV-PDS. **(B)** Confocal microscopy analysis of non-infected (n.i. - top left) and TRV-PDS  
762 systemically-infected leaves of 35S:B2:GFP/Col-0 plants. On the right, higher magnification  
763 (63x) images of TRV replication complexes from the same tissues as those visible at lower  
764 magnification (20x) on the left middle and bottom. **(C)** Northern blot analysis of high  
765 molecular weight RNA from total fractions of TRV-PDS-infected wild-type or 35S:B2:GFP

766 *N. benthamiana* (left), and from total (middle) and anti-GFP immunoprecipitated (right)  
767 fractions from infected 35S:*GFP* and 35S:*B2:GFP/Col-0 A. thaliana*. **(D)** Northwestern blot  
768 analysis of native-state high molecular weight RNA from samples described in (C). EtBr  
769 staining was used as loading control in (C) and (D). **(E)** Northern blot analysis of low  
770 molecular weight RNA from samples described in (C). The probes were applied sequentially  
771 on the same membrane in successive rounds of probing and stripping. snU6 and miR159  
772 were used as loading controls. **(F)** Western blot analysis of proteins from the same  
773 immunoprecipitation experiment analyzed in (C). Coomassie staining was used as loading  
774 control. Source data is available with the Blotting Source Data.

775

776 **Figure 2: Immunoprecipitation of B2:GFP allows the isolation of TRV proteins and**  
777 **host factors.** Mass spectrometry analyses of anti-GFP immunoprecipitated proteins from  
778 TRV-PDS-infected 35S:*GFP/Col-0* and 35S:*B2:GFP/Col-0* plants. Three technical replicates  
779 were performed and analyzed per genotype. *A. thaliana* proteins shown here are the ones that  
780 have been tested in this study. Abbreviations correspond to those available in literature,  
781 except for RP27a and RUP1, which have been here assigned for lack of previously  
782 established ones. Accession numbers correspond to UniProt (TRV proteins) and TAIR (*A.*  
783 *thaliana* proteins) databases. **(A)** Table containing the spectral counts obtained per technical  
784 replicate for bait proteins (GFP + B2), TRV proteins and *A. thaliana* proteins. **(B)** Volcano  
785 plot representation shows the enrichment of proteins from TRV-infected plants that co-  
786 purified with B2:GFP. Y- and X-axis display adjusted p-values and fold changes,  
787 respectively. The dashed line indicates the threshold above which proteins are significantly  
788 enriched ( $\text{adj}P < 0.05$ ). The source data are available in **Supplementary Table 2**, **(C)**  
789 Sequence coverage obtained on all the proteins listed in (A). For each of the 14 entries, the  
790 length of the protein is displayed while the covered residues are highlighted with blue vertical

791 bars. The total number of spectra matching on each protein in the three replicates is indicated,  
792 as well as the corresponding total number of unique peptide sequences. The complete protein  
793 list can be found in Supplementary Table 2.

794

795 **Figure 3: tRFP does not re-localize to TRV replication complexes.** Laser confocal  
796 microscopy on 35S:B2:GFP/N. *benthamiana* leaves transiently expressing 35S:tRFP. (A)  
797 Acquisition from non-infected leaf disks (20x objective). Scale bars indicate 50  $\mu$ m. (B)  
798 Acquisition of TRV-PDS-infected leaf disks (20x objective, top), focused on TRV replication  
799 complexes (63x objective, middle and bottom). Scale bars indicate 50 and 10  $\mu$ m,  
800 respectively. Additional acquisitions can be found with the Microscopy Source Data.

801

802 **Figure 4: A. thaliana double-stranded RNA-binding proteins localize at TRV replication**  
803 **complexes.** Laser confocal microscopy on 35S:B2:GFP/N. *benthamiana* leaves transiently  
804 expressing 35S:DRB2:tRFP (A,B) or 35S:DRB4:tRFP (C,D). (A) Acquisitions with 20x  
805 objective of non-infected (top) and TRV-PDS-infected (bottom) leaf disks expressing  
806 DRB2:tRFP. Scale bars indicate 50  $\mu$ m. (B) Acquisitions with 63x objective of TRV-PDS-  
807 infected leaf disks of tissue described in (A). Scale bars indicate 10  $\mu$ m. (C,D) As in (A,B),  
808 but from tissue expressing DRB4:tRFP. Additional acquisitions can be found with the  
809 Microscopy Source Data.

810

811 **Figure 5: Proteins previously implicated in viral life cycle localize at or near the**  
812 **replication complexes.** Laser confocal microscopy on 35S:B2:GFP/N. *benthamiana* TRV-  
813 PDS-infected leaf disks transiently expressing (A) 35S:HSP70:tRFP, (B) 35S:HSP70-  
814 1:tRFP, (C) 35S:HSP70-3:tRFP, (D) 35S:BTR1:tRFP. Acquisitions in (A): 20x objective,

815 scale bars indicate 50  $\mu$ m. Acquisitions in (B, C, D): 63x objective, scale bars indicate 10  $\mu$ m.

816 Additional acquisitions can be found with the Microscopy Source Data.

817

818 **Figure 6: Localization of previously undescribed proteins at or near the replication**

819 **complexes.** Laser confocal microscopy (63x objective) on *35S:B2:GFP/N. benthamiana*

820 TRV-PDS-infected leaf disks transiently expressing (A) *35S:RUP1:tRFP*, (B)

821 *35S:tRFP:RP27a*, (C) *35S:tRFP:NFD2*. Scale bars indicate 10  $\mu$ m. Additional acquisitions

822 can be found with the Microscopy Source Data.

823

824 **Figure 7: Knock-out of DRB2 causes increased systemic accumulation of TRV in**

825 **Arabidopsis, through a mechanism independent from small RNA biogenesis.** Northern

826 blot analysis of RNA from inoculated leaves (A) and systemically infected leaves (B) of

827 Arabidopsis knock-out lines infected with TRV-PDS, 3 and 12 days post-infection (dpi),

828 respectively. Previously published mutants are indicated with their current name, while the

829 others are indicated with their SALK nomenclature. Each sample is a pool of 4-5 plants, and

830 two samples were analyzed per genotype (1 and 2), per time point. EtBr staining was used as

831 loading control. (C) PAGE northern blot analysis of small RNA from the corresponding

832 samples in (B). snU6 and miR159 were used as loading controls. N.i.: non-infected. Source

833 data is available with the Blotting Source Data.

834

835 **Figure 8: Over-expression of DRB2 in *N. benthamiana* leaves drastically reduces**

836 **accumulation of a wide range of RNA viruses.** (A) Northern blot analysis of RNA from *N.*

837 *benthamiana* leaf disks 4 days after transient transformation with *35S:tRFP* or

838 *35S:DRB2:tRFP* and 3 dpi with TRV-PDS (except for n.i.: non-infected). Each sample is a

839 pool of 40-50 leaf disks from 4-5 leaves. In the case of the virus-infected leaves, two samples



840 were analyzed per condition (indicated with 1 and 2). Methylene blue staining of the  
841 membrane was used as loading control. **(B)** As in (A), but after rub-inoculation with tomato  
842 bushy stunt virus (TBSV). Two independent biological replicates are shown with either  
843 methylene blue or EtBr staining of the membranes as loading control. **(C)** As in (A), but after  
844 rub-inoculation with potato virus X (PVX). **(D)** As in (A), but after rub-inoculation with  
845 grapevine fanleaf virus (GFLV). **(E)** Western blot analysis on protein extracts from the  
846 samples analyzed in (A-D), to detect tRFP. Coomassie blue staining was used as loading  
847 control. Source data is available with the Blotting Source Data. **(F)** Laser confocal  
848 microscopy acquisitions of B2-labeled TBSV replication complexes, from *35S:B2:GFP/N.*  
849 *benthamiana* plants transiently expressing DRB2:tRFP and infected with TBSV. Scale bars  
850 indicate 50 (top) or 10  $\mu\text{m}$  (middle and bottom). **(G)** As in (F), but from plants (non-infected  
851 in the top row, TBSV-infected in the rest) transiently expressing the peroxisome marker  
852 tRFP-SKL. Scale bars indicate 50 (top two acquisitions) or 10  $\mu\text{m}$  (bottom two acquisitions).  
853 Additional acquisitions can be found with the Microscopy Source Data.

854

#### 855 **Supplementary Table 1.**

856 List of proteins detected by mass spectrometry in GFP pull-downs from *35S:GFP/Col-0* and  
857 *35S:B2:GFP/Col-0* plants infected with TRV-PDS. Here are shown only proteins present  
858 exclusively in B2:GFP or with a B2:GFP/GFP detection ratio  $\geq 2$ . The candidates further  
859 investigated in this study are highlighted. A more detailed legend is present at the top of the  
860 spreadsheet.

861

#### 862 **Supplementary Table 2.**

863 List of proteins detected by mass spectrometry in GFP pull-downs from *35S:GFP/Col-0* and  
864 *35S:B2:GFP/Col-0* plants in both non-infected and TRV-infected conditions. The IP from

865 non-infected 35S:*GFP*/Col-0 vs 35S:*B2:GFP*/Col-0 plants was performed in a different  
866 experiment from that on TRV-infected plants (shown in Supplementary Table 1). The  
867 proteins detected have been sorted according to their presence/absence in the different  
868 genotypes and conditions. The candidates further investigated in this study are highlighted. A  
869 more detailed legend is present at the top of the spreadsheet.

870

871 **Supplementary Table 3.**

872 List of primers and probes used in this study.

873

874 **Supplementary Figure 1:** (A) Western blot analysis to detect GFP in protein extracts from  
875 35S:*B2:GFP* transgenic *A. thaliana* lines in Col-0 and *dcl2-1*, *dcl4-2* and triple *dcl2-1/dcl3-*  
876 *1/dcl4-2* mutant backgrounds. Coomassie blue was used as loading control. (B) Northern  
877 analysis of low molecular weight RNA (PAGE gel) from the plants described in (A), to  
878 detect endogenous miRNA (miR159, miR160) and siRNA (TAS1, IR71). Probes were  
879 hybridized to the membrane through sequential stripping and probing. (C) Photos of the  
880 plants described in (A). (D) *N. benthamiana* leaf infiltrated with *A. tumefaciens* expressing  
881 GFP alone (top left) or in combination with P38, B2:tRFP or B2mut:tRFP, and illuminated  
882 with UV light. (E) Western blot analysis to detect GFP (top) and tRFP (bottom) in protein  
883 extracts from the infiltrated patches described in (E). (F) Northern analysis of high molecular  
884 weight RNA (agarose gel) from TRV-PDS systemically infected Col-0 and *dcl* mutant  
885 backgrounds. Source data is available with the Blotting Source Data.

886

887 **Supplementary Figure 2:** Western analysis to detect GFP in protein extracts from the input,  
888 flow-through and anti-GFP immunoprecipitated fractions obtained from TRV-PDS-infected  
889 35S:*GFP*/Col-0 and 35S:*B2:GFP*/Col-0 plants, performed in three technical replicates.

890 Coomassie staining was used as loading control. The proteins from the immunoprecipitated  
891 fraction were further analyzed by mass spectrometry, and the results are shown in Table 1.  
892 Source data is available with the Blotting Source Data.

893

894 **Supplementary Figure 3:** Laser confocal microscopy (20x objective) on *35S:B2:GFP/N.*  
895 *benthamiana* non-infected (left) and TRV-PDS-infected (right) leaf disks transiently  
896 expressing (A) *35S:HSP70:tRFP*, (B) *35S:HSP70-1:tRFP*, (C) *35S:HSP70-3:tRFP*, (D)  
897 *35S:BTR1:tRFP*. Scale bars indicate 50µm. Additional acquisitions can be found with the  
898 Microscopy Source Data in the Supplementary Information.

899

900

901 **Supplementary Figure 4:** Laser confocal microscopy (20x objective) on *35S:B2:GFP/N.*  
902 *benthamiana* non-infected (left) and TRV-PDS-infected (right) leaf disks transiently  
903 expressing (A) *35S:RUP1:tRFP*, (B) *35S:tRFP:RP27a*, (C) *35S:tRFP:NFD2*. Scale bars  
904 indicate 50µm. Additional acquisitions can be found with the Microscopy Source Data in the  
905 Supplementary Information.

906

907 **Supplementary Figure 5:** (A) Sequence coverage obtained by MS on the RP27a protein  
908 (P59271). Four distinct tryptic peptides have been validated by Mascot algorithm at  
909 FDR<1% (bold residues). The total number of spectra matching on the 4 peptides are  
910 displayed as green bars with a color code according to the replicate. The Ubiquitin domain  
911 [1-76] is highlighted in green. Tryptic cleavage sites (K/R) are underlined. (B) Multiple  
912 sequence alignment between RP27a sequence and UBQ1 to UBQ14 *A.thaliana* sequences  
913 (UniProtKB). Output generated with the MUSCLE tool  
914 (<https://www.ebi.ac.uk/Tools/msa/muscle>). (C) MS/MS spectrum corresponding to the

915 ubiquitinated peptide [43-54] LIFAGK(Ub)QLEDGR identified by Mascot algorithm on  
916 RP27a protein (Score = 55.68, m/z=487.60, 3+, RT=42.97min). The fragmentation pattern  
917 involving the y- and b-ions validated by Mascot is displayed on the upper left corner. The di-  
918 glycine motif is highlighted by the GL abbreviation above the K-48 residue, as well as the  
919 mass difference between y(6) and y(7) fragments.

920

921

## 922 **REFERENCES**

- 923 1. Grangeon R, Jiang J, Laliberte JF. Host endomembrane recruitment for plant RNA  
924 virus replication. *Current Opinion in Virology*. 2012;2(6):683-90.
- 925 2. Jiang J, Laliberté J-F. Membrane Association for Plant Virus Replication and  
926 Movement. In: Wang A, Zhou X, editors. *Current Research Topics in Plant Virology*. Cham:  
927 Springer International Publishing; 2016. p. 67-85.
- 928 3. Ritzenthaler C, Elamawi R. The ER in replication of positive-strand RNA viruses. In:  
929 Robinson DG, editor. *Plant Cell Monogr*. 4. Berlin - Heidelberg: Springer-Verlag; 2006. p.  
930 309-30.
- 931 4. Verchot J. Wrapping membranes around plant virus infection. *Curr Opin Virol*.  
932 2011;1(5):388-95.
- 933 5. Nagy PD. Tombusvirus-host interactions: co-opted evolutionarily conserved host  
934 factors take center court. *Annual Review of Virology*. 2016;3:491-515.
- 935 6. Nagy PD, Pogany J. The dependence of viral RNA replication on co-opted host  
936 factors. *Nature Reviews Microbiology*. 2012;10(2):137-49.
- 937 7. Wang A. Dissecting the molecular network of virus-plant interactions: the complex  
938 roles of host factors. *Annual review of phytopathology*. 2015;53:45-66.

- 939 8. Barton DA, Roovers EF, Gouil Q, da Fonseca GC, Reis RS, Jackson C, et al. Live  
940 Cell Imaging Reveals the Relocation of dsRNA Binding Proteins Upon Viral Infection.  
941 *Molecular plant-microbe interactions*. 2017;30(6):435-43.
- 942 9. Incarbone M, Dunoyer P. RNA silencing and its suppression: novel insights from in  
943 planta analyses. *Trends in plant science*. 2013;18(7):382-92.
- 944 10. Elvira-Matlot E, Hachet M, Shamandi N, Comella P, Saez-Vasquez J, Zytnicki M, et  
945 al. Arabidopsis RNASE THREE LIKE2 modulates the expression of protein-coding genes  
946 via 24-nt siRNA-directed DNA methylation. *The Plant Cell*. 2016:TPC2015-00540-RA.
- 947 11. Monsion B, Incarbone M, Hleibieh K, Poignavent V, Ghannam A, Dunoyer P, et al.  
948 Efficient Detection of Long dsRNA in Vitro and in Vivo Using the dsRNA Binding Domain  
949 from FHV B2 Protein. *Front Plant Sci*. 2018;9(70):70. doi: 10.3389/fpls.2018.00070.
- 950 12. Nagy PD, Strating JR, van Kuppeveld FJ. Building Viral Replication Organelles:  
951 Close Encounters of the Membrane Types. *PLoS Pathog*. 2016;12(10):e1005912.
- 952 13. Cheng X, Deng P, Cui H, Wang A. Visualizing double-stranded RNA distribution and  
953 dynamics in living cells by dsRNA binding-dependent fluorescence complementation.  
954 *Virology*. 2015;485:439-51.
- 955 14. Li Y, Xiong R, Bernards M, Wang A. Recruitment of Arabidopsis RNA Helicase  
956 AtRH9 to the Viral Replication Complex by Viral Replicase to Promote Turnip Mosaic Virus  
957 Replication. *Sci Rep*. 2016;6:30297. doi: 10.1038/srep30297.
- 958 15. Wei T, Zhang C, Hou X, Sanfacon H, Wang A. The SNARE protein Syp71 is  
959 essential for turnip mosaic virus infection by mediating fusion of virus-induced vesicles with  
960 chloroplasts. *PLoS Pathog*. 2013;9(5):e1003378.
- 961 16. Dufresne PJ, Thivierge K, Cotton S, Beauchemin C, Ide C, Ubalijoro E, et al. Heat  
962 shock 70 protein interaction with Turnip mosaic virus RNA-dependent RNA polymerase  
963 within virus-induced membrane vesicles. *Virology*. 2008;374(1):217-27.

- 964 17. Lõhmus A, Varjosalo M, Mäkinen K. Protein composition of 6K2□induced  
965 membrane structures formed during Potato virus A infection. *Molecular plant pathology*.  
966 2016;17(6):943-58.
- 967 18. Wang X, Cao X, Liu M, Zhang R, Zhang X, Gao Z, et al. Hsc70-2 is required for Beet  
968 black scorch virus infection through interaction with replication and capsid proteins.  
969 *Scientific reports*. 2018;8(1):4526.
- 970 19. Merzlyak EM, Goedhart J, Shcherbo D, Bulina ME, Shcheglov AS, Fradkov AF, et  
971 al. Bright monomeric red fluorescent protein with an extended fluorescence lifetime. *Nat*  
972 *Methods*. 2007;4:555-7.
- 973 20. Pumplin N, Voinnet O. RNA silencing suppression by plant pathogens: defence,  
974 counter-defence and counter-counter-defence. *Nat Rev Micro*. 2013;11(11):745-60. doi:  
975 10.1038/nrmicro3120.
- 976 21. Incarbone M, Zimmermann A, Hammann P, Erhardt M, Michel F, Dunoyer P.  
977 Neutralization of mobile antiviral small RNA through peroxisomal import. *Nature plants*.  
978 2017;3(7):17094.
- 979 22. Kasschau KD, Xie Z, Allen E, Llave C, Chapman EJ, Krizan KA, et al. P1/HC-Pro, a  
980 viral suppressor of RNA silencing, interferes with Arabidopsis development and miRNA  
981 function. *Developmental cell*. 2003;4(2):205-17.
- 982 23. Li H, Li WX, Ding SW. Induction and suppression of RNA silencing by an animal  
983 virus. *Science*. 2002;296(5571):1319-21.
- 984 24. Seo JK, Kwon SJ, Rao AL. Molecular dissection of Flock house virus protein B2  
985 reveals that electrostatic interactions between N-terminal domains of B2 monomers are  
986 critical for dimerization. *Virology*. 2012;432(2):296-305.

- 987 25. Chao JA, Lee JH, Chapados BR, Debler EW, Schneemann A, Williamson JR. Dual  
988 modes of RNA-silencing suppression by Flock House virus protein B2. *Nat Struct Mol Biol.*  
989 2005;12(11):952-7.
- 990 26. Qi N, Zhang L, Qiu Y, Wang Z, Si J, Liu Y, et al. Targeting of dicer-2 and RNA by a  
991 viral RNA silencing suppressor in *Drosophila* cells. *J Virol.* 2012;86(10):5763-73.
- 992 27. Singh G, Popli S, Hari Y, Malhotra P, Mukherjee S, Bhatnagar RK. Suppression of  
993 RNA silencing by Flock house virus B2 protein is mediated through its interaction with the  
994 PAZ domain of Dicer. *Faseb J.* 2009;23(6):1845-57.
- 995 28. Liu Y, Schiff M, Dinesh-Kumar SP. Virus-induced gene silencing in tomato. *Plant J.*  
996 2002;31(6):777-86.
- 997 29. Deleris A, Gallego-Bartolome J, Bao J, Kasschau KD, Carrington JC, Voinnet O.  
998 Hierarchical action and inhibition of plant Dicer-like proteins in antiviral defense. *Science.*  
999 2006;313(5783):68-71.
- 1000 30. Fujisaki K, Ishikawa M. Identification of an *Arabidopsis thaliana* protein that binds to  
1001 tomato mosaic virus genomic RNA and inhibits its multiplication. *Virology.*  
1002 2008;380(2):402-11.
- 1003 31. Clavel M, Pélissier T, Descombin J, Jean V, Picart C, Charbonel C, et al. Parallel  
1004 action of AtDRB2 and RdDM in the control of transposable element expression. *BMC Plant*  
1005 *Biology.* 2015;15:70.
- 1006 32. Bhat R, Vyas D. Myrosinase: insights on structural, catalytic, regulatory, and  
1007 environmental interactions. *Critical Reviews in Biotechnology.* 2019;39(4):508-23.
- 1008 33. Otulak K, Chouda M, Bujarski J, Garbaczewska G. The evidence of Tobacco rattle  
1009 virus impact on host plant organelles ultrastructure. *Micron.* 2015;70:7-20.
- 1010 34. Schauer SE, Jacobsen SE, Meinke DW, Ray A. DICER-LIKE1: blind men and  
1011 elephants in *Arabidopsis* development. *Trends in plant science.* 2002;7(11):487-91.

- 1012 35. Tschopp M-A, Iki T, Brosnan CA, Jullien PE, Pumplin N. A complex of Arabidopsis  
1013 DRB proteins can impair dsRNA processing. *RNA*. 2017;23(5):782-97.
- 1014 36. Eamens AL, Kim KW, Curtin SJ, Waterhouse PM. DRB2 is required for microRNA  
1015 biogenesis in *Arabidopsis thaliana*. *PLoS One*. 2012;7(4):e35933.
- 1016 37. Péliissier T, Clavel M, Chaparro C, Pouch-Péliissier M-N, Vaucheret H, Deragon J-M.  
1017 Double-stranded RNA binding proteins DRB2 and DRB4 have an antagonistic impact on  
1018 polymerase IV-dependent siRNA levels in *Arabidopsis*. *RNA*. 2011;17(8):1502-10.
- 1019 38. Fukudome A, Kanaya A, Egami M, Nakazawa Y, Hiraguri A, Moriyama H, et al.  
1020 Specific requirement of DRB4, a dsRNA-binding protein, for the in vitro dsRNA-cleaving  
1021 activity of *Arabidopsis* Dicer-like 4. *RNA*. 2011;17(4):750-60.
- 1022 39. Montavon T, Kwon Y, Zimmermann A, Hammann P, Vincent T, Cognat V, et al. A  
1023 specific dsRNA-binding protein complex selectively sequesters endogenous inverted-repeat  
1024 siRNA precursors and inhibits their processing. *Nucleic acids research*. 2017;45(3):1330-44.
- 1025 40. Jakubiec A, Yang SW, Chua NH. *Arabidopsis* DRB4 protein in antiviral defense  
1026 against Turnip yellow mosaic virus infection. *Plant J*. 2012;69(1):14-25.
- 1027 41. Qu F, Ye X, Morris TJ. *Arabidopsis* DRB4, AGO1, AGO7, and RDR6 participate in a  
1028 DCL4-initiated antiviral RNA silencing pathway negatively regulated by DCL1. *Proceedings*  
1029 *of the National Academy of Sciences*. 2008;105(38):14732-7.
- 1030 42. Verchot J. Cellular chaperones and folding enzymes are vital contributors to  
1031 membrane bound replication and movement complexes during plant RNA virus infection.  
1032 *Frontiers in plant science*. 2012;3:275.
- 1033 43. Löhmus A, Hafren A, Mäkinen K. Coat protein regulation by CK2, CPIP, HSP70, and  
1034 CHIP is required for potato virus A replication and coat protein accumulation. *Journal of*  
1035 *virology*. 2017;91(3):e01316-16.



- 1036 44. Pogany J, Nagy PD. Activation of Tomato bushy stunt virus RNA-dependent RNA  
1037 polymerase by cellular heat shock protein 70 is enhanced by phospholipids in vitro. *Journal*  
1038 *of virology*. 2015;89(10):5714-23.
- 1039 45. Yang J, Zhang F, Cai N-J, Wu N, Chen X, Li J, et al. A furoviral replicase recruits  
1040 host HSP70 to membranes for viral RNA replication. *Scientific reports*. 2017;7(1):1-15.
- 1041 46. Portereiko MF, Sandaklie-Nikolova L, Lloyd A, Dever CA, Otsuga D, Drews GN.  
1042 NUCLEAR FUSION DEFECTIVE1 encodes the Arabidopsis RPL21M protein and is  
1043 required for karyogamy during female gametophyte development and fertilization. *Plant*  
1044 *physiology*. 2006;141(3):957-65.
- 1045 47. Curtin SJ, Watson JM, Smith NA, Eamens AL, Blanchard CL, Waterhouse PM. The  
1046 roles of plant dsRNA-binding proteins in RNAi-like pathways. *FEBS letters*.  
1047 2008;582(18):2753-60.
- 1048 48. Incarbone M, Ritzenthaler C, Dunoyer P. Peroxisomal Targeting as a Sensitive Tool  
1049 to Detect Protein-Small RNA Interactions through in Vivo Piggybacking. *Frontiers in Plant*  
1050 *Science*. 2018;9(135).
- 1051 49. Li F, Wang A. RNA-Targeted Antiviral Immunity: More Than Just RNA Silencing.  
1052 *Trends Microbiol*. 2019;27(9):792-805.
- 1053 50. Nishikiori M, Dohi K, Mori M, Meshi T, Naito S, Ishikawa M. Membrane-bound  
1054 tomato mosaic virus replication proteins participate in RNA synthesis and are associated with  
1055 host proteins in a pattern distinct from those that are not membrane bound. *Journal of*  
1056 *virology*. 2006;80(17):8459-68.
- 1057 51. Serva S, Nagy PD. Proteomics analysis of the tombusvirus replicase: Hsp70  
1058 molecular chaperone is associated with the replicase and enhances viral RNA replication.  
1059 *Journal of virology*. 2006;80(5):2162-9.

- 1060 52. Kobayashi K, Tomita R, Sakamoto M. Recombinant plant dsRNA-binding protein as  
1061 an effective tool for the isolation of viral replicative form dsRNA and universal detection of  
1062 RNA viruses. *Journal of General Plant Pathology*. 2009;75(2):87-91.
- 1063 53. Fernández de Castro I, Fernández JJ, Barajas D, Nagy PD, Risco C. Three-  
1064 dimensional imaging of the intracellular assembly of a functional viral RNA replicase  
1065 complex. *Journal of Cell Science*. 2017;130(1):260-8.
- 1066 54. Romero-Brey I, Bartenschlager R. Membranous replication factories induced by plus-  
1067 strand RNA viruses. *Viruses*. 2014;6(7):2826-57.
- 1068 55. Alcaide-Loridan C, Jupin I. Ubiquitin and plant viruses, let's play together! *Plant*  
1069 *physiology*. 2012;160(1):72-82.
- 1070 56. Verchot J. Plant Virus Infection and the Ubiquitin Proteasome Machinery: Arms Race  
1071 along the Endoplasmic Reticulum. *Viruses*. 2016;8(11):314.
- 1072 57. Sainsbury F, Thuenemann EC, Lomonosoff GP. pEAQ: versatile expression vectors  
1073 for easy and quick transient expression of heterologous proteins in plants. *Plant Biotechnol J*.  
1074 2009;7(7):682-93.
- 1075 58. Harrison SJ, Mott EK, Parsley K, Aspinall S, Gray JC, Cottage A. A rapid and robust  
1076 method of identifying transformed *Arabidopsis thaliana* seedlings following floral dip  
1077 transformation. *Plant Methods*. 2006;2(1):19. doi: 10.1186/1746-4811-2-19.
- 1078 59. Engler C, Gruetzner R, Kandzia R, Marillonnet S. Golden gate shuffling: a one-pot  
1079 DNA shuffling method based on type IIs restriction enzymes. *PloS one*. 2009;4(5):e5553.
- 1080 60. Hurkman WJ, Tanaka CK. Solubilization of plant membrane proteins for analysis by  
1081 two-dimensional gel electrophoresis. *Plant Physiol*. 1986;81:802-6.
- 1082 61. Chicher J, Simonetti A, Kuhn L, Schaeffer L, Hammann P, Eriani G, et al.  
1083 Purification of mRNA-programmed translation initiation complexes suitable for mass  
1084 spectrometry analysis. *Proteomics*. 2015;15(14):2417-25.

- 1085 62. Lange H, Ndecky SYA, Gomez-Diaz C, Pflieger D, Butel N, Zumsteg J, et al. RST1  
1086 and RIPR connect the cytosolic RNA exosome to the Ski complex in Arabidopsis. *Nature*  
1087 *Communications*. 2019;10(1):3871. doi: 10.1038/s41467-019-11807-4.
- 1088 63. Robinson MD, McCarthy DJ, Smyth GK. edgeR: a Bioconductor package for  
1089 differential expression analysis of digital gene expression data. *Bioinformatics*.  
1090 2010;26(1):139-40.

# Figure 1

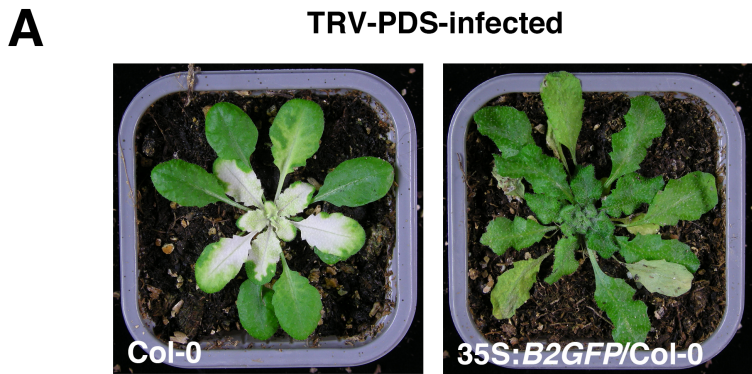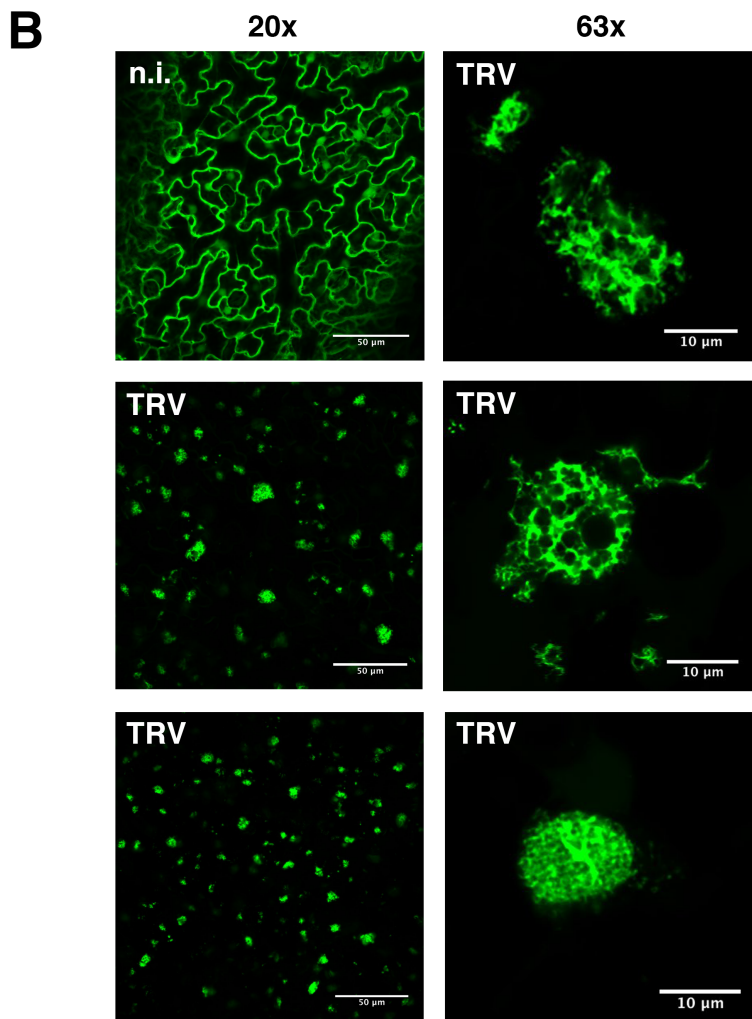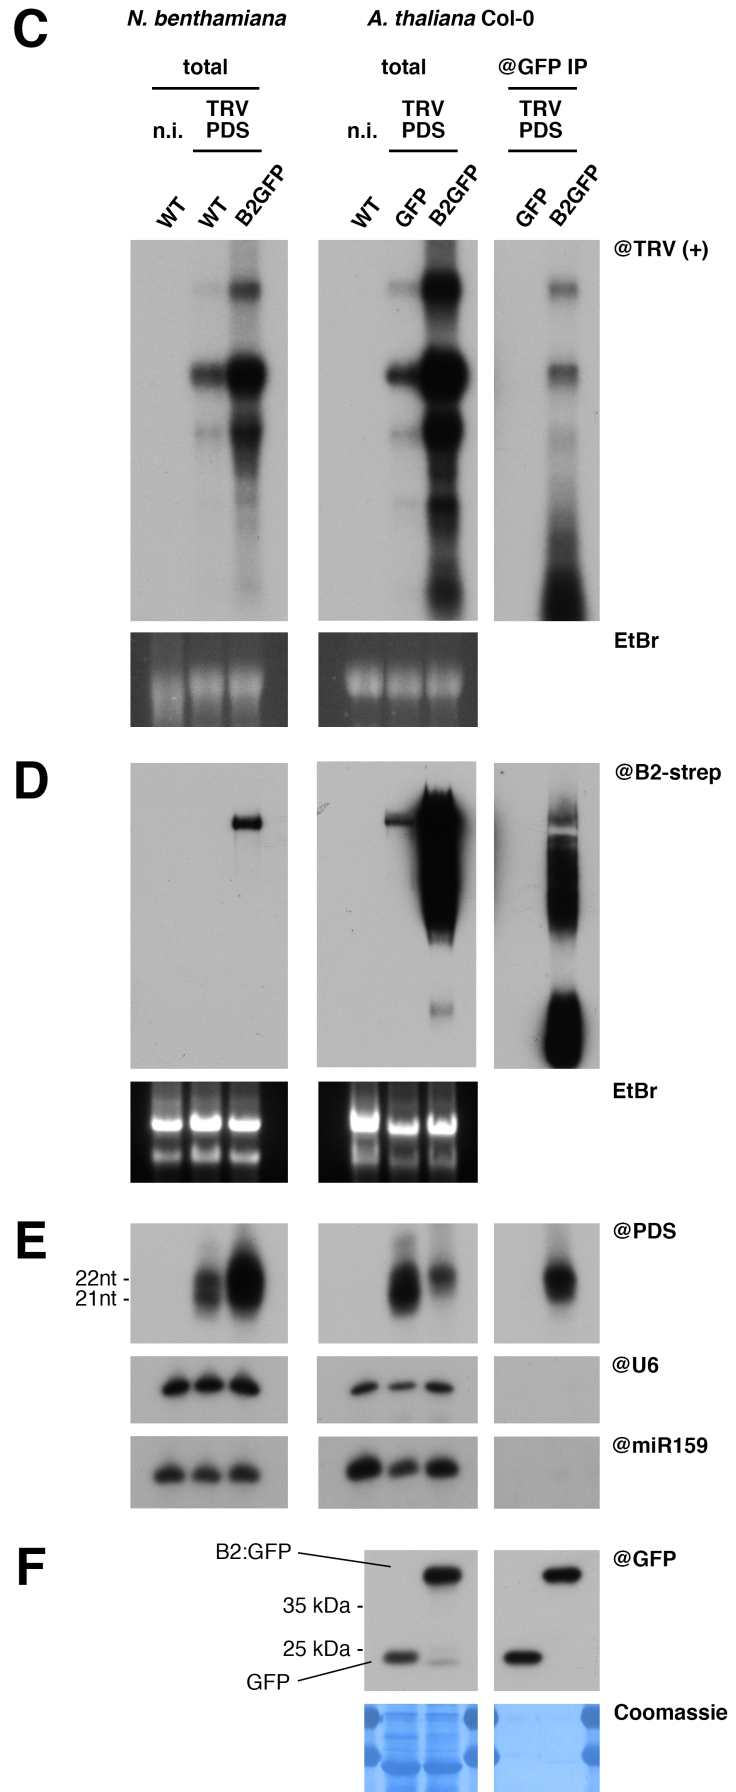

## Figure 2

**A**

| Description                     | Abbreviation | Accession | Spectral count |     |     |                 |      |     |
|---------------------------------|--------------|-----------|----------------|-----|-----|-----------------|------|-----|
|                                 |              |           | 35S:GFP/Col-0  |     |     | 35S:B2GFP/Col-0 |      |     |
|                                 |              |           | #1             | #2  | #3  | #1              | #2   | #3  |
| GFP                             |              |           | 425            | 504 | 676 | 871             | 1042 | 963 |
| B2                              |              |           | 4              |     |     | 878             | 806  | 883 |
| TRV Replicase                   |              | Q9J942    |                |     |     | 203             | 219  | 220 |
| TRV Coat Protein                |              | Q88897    |                |     |     | 249             | 250  | 250 |
| TRV 16k Protein                 |              | Q77JX3    |                |     |     | 6               | 8    | 5   |
| Ribosomal protein S27a          | RP27a        | AT1G23410 |                |     |     | 27              | 29   | 26  |
| Heat Shock Protein 70-1         | HSP70-1      | AT5G02500 |                |     |     | 24              | 29   | 28  |
| Heat Shock Protein 70-3         | HSP70-3      | AT3G09440 |                |     |     | 22              | 26   | 23  |
| Heat Shock Protein 70           | HSP70        | AT3G12580 |                |     |     | 18              | 23   | 22  |
| RING/U-box Protein              | RUP1         | AT3G45570 |                |     |     | 17              | 19   | 14  |
| Ribonuclease III family protein | NFD2         | AT1G24450 |                |     |     | 2               | 4    | 6   |
| Binding to ToMV RNA 1           | BTR1         | AT5G04430 |                |     |     | 2               | 4    | 1   |
| DsRNA-binding Protein 4         | DRB4         | AT3G62800 |                |     |     | 2               | 2    | 1   |
| DsRNA-binding Protein 2         | DRB2         | AT2G28380 |                |     |     |                 | 1    | 3   |

**B**

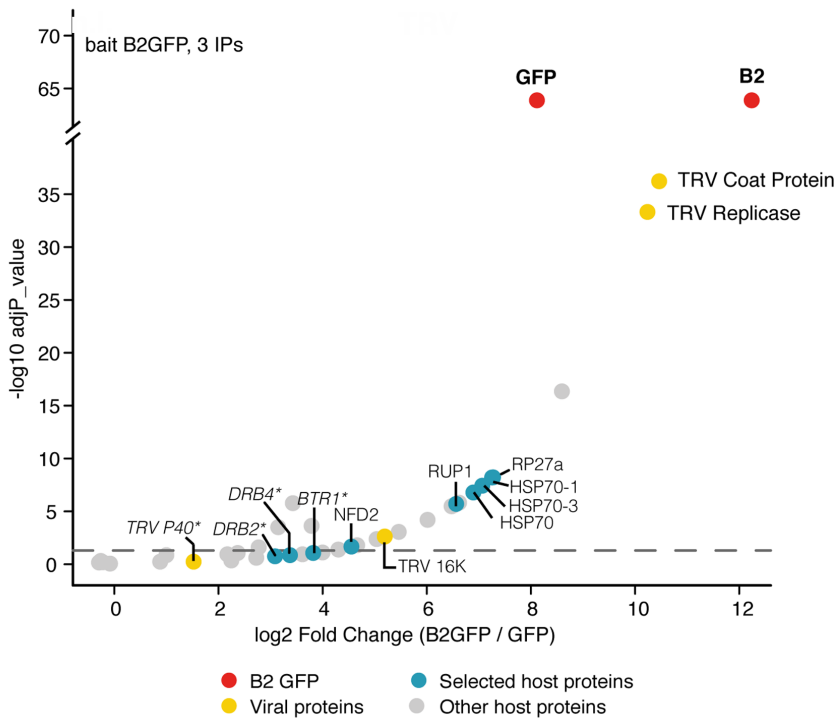

**C**

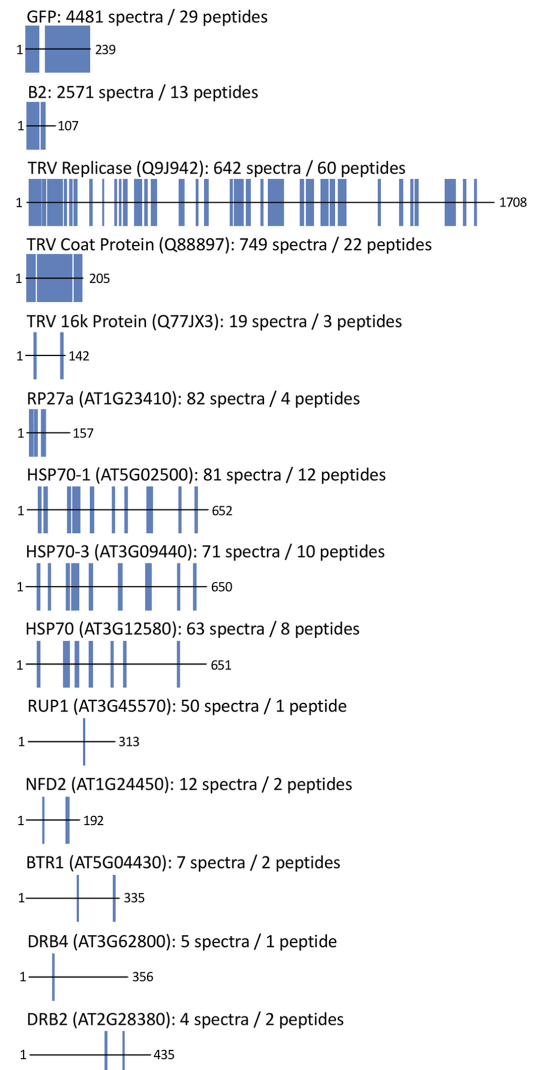



# Figure 3

bioRxiv preprint doi: <https://doi.org/10.1101/842666>; this version posted March 12, 2020. The copyright holder for this preprint (which was not certified by peer review) is the author/funder, who has granted bioRxiv a license to display the preprint in perpetuity. It is made available under aCC-BY 4.0 International license.

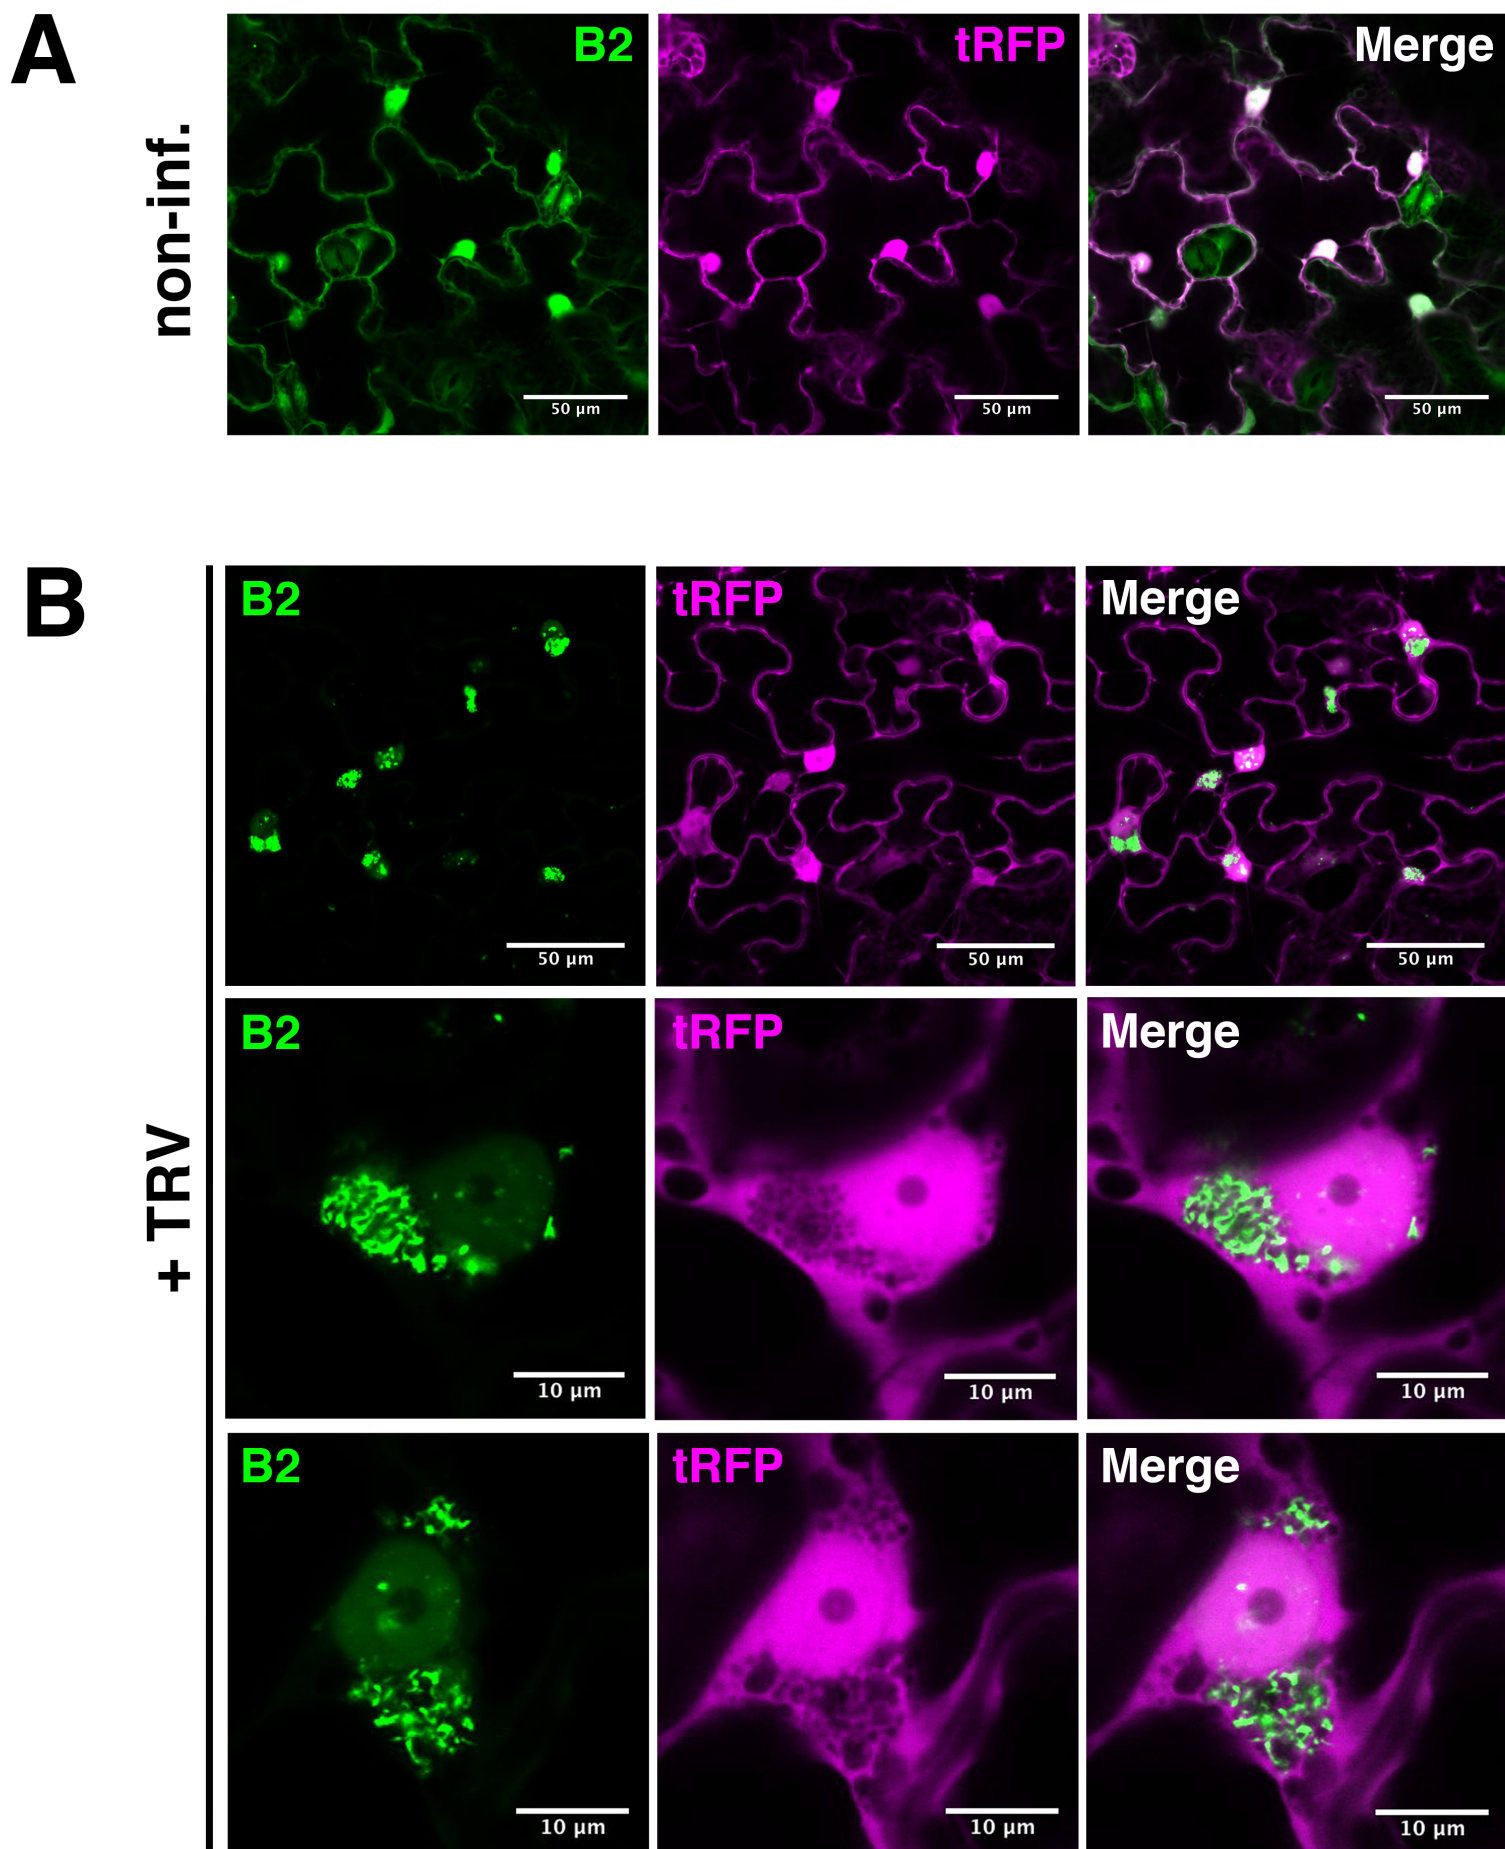

## Figure 4

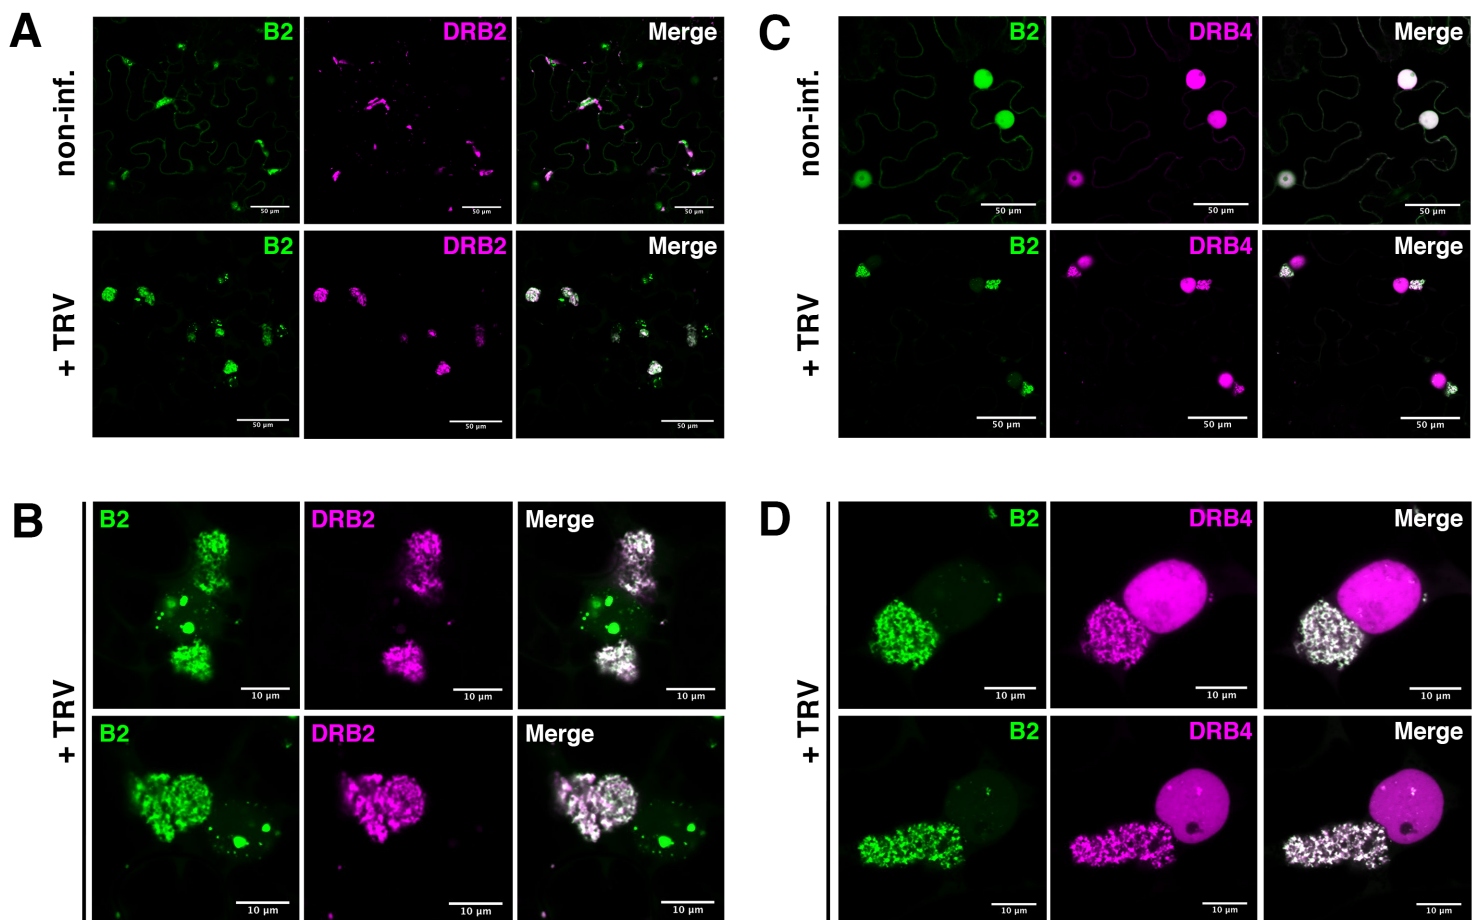

## Figure 5

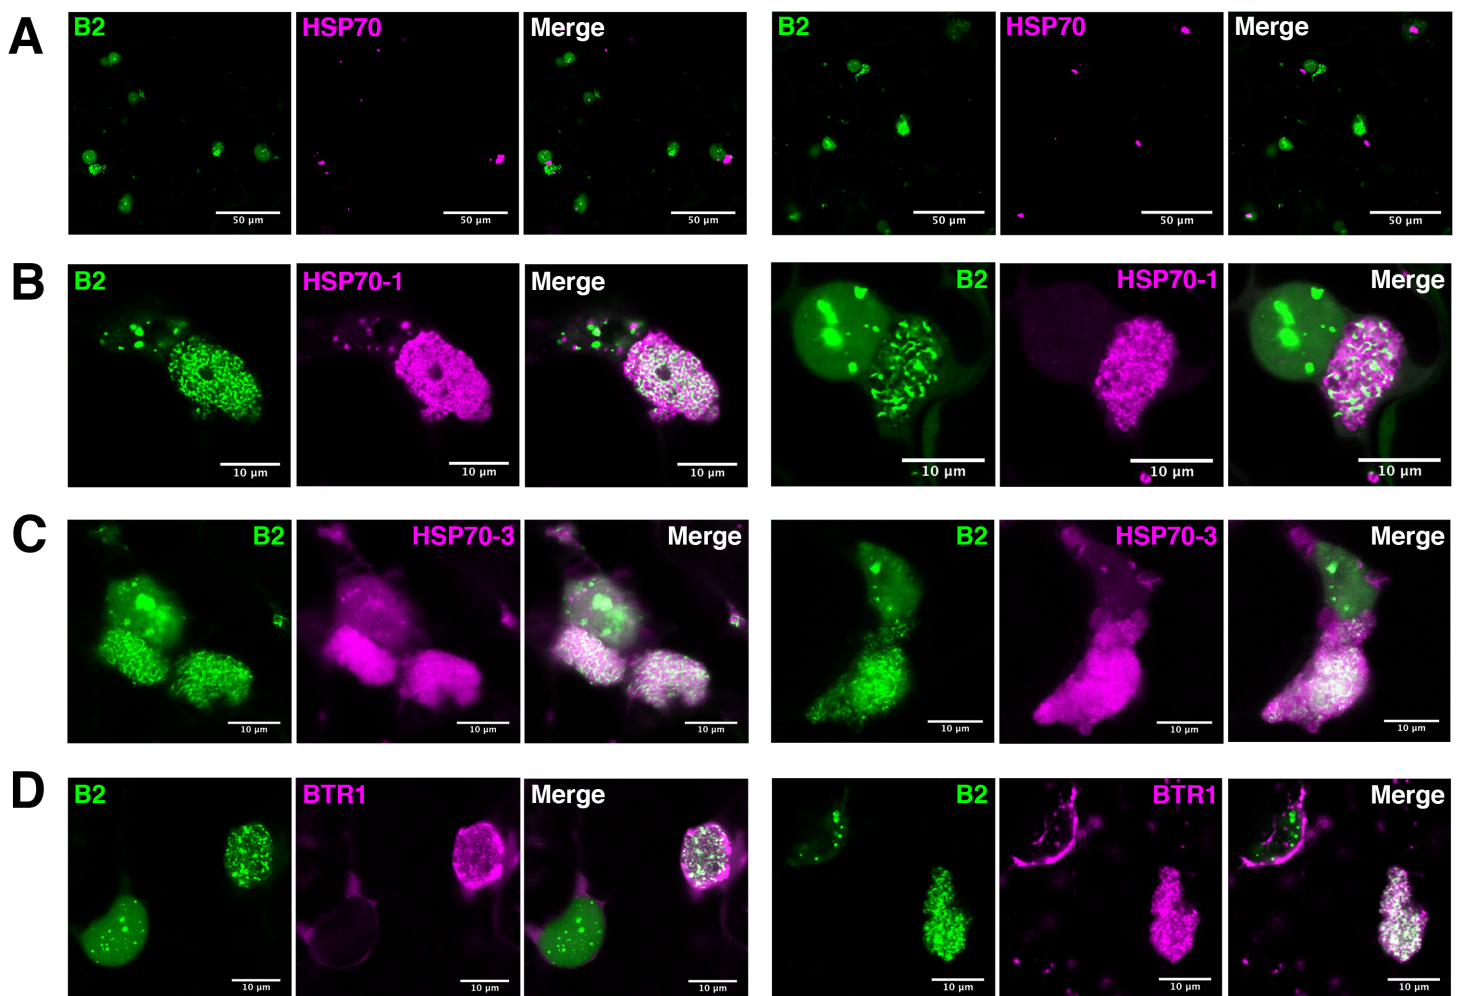



## Figure 6

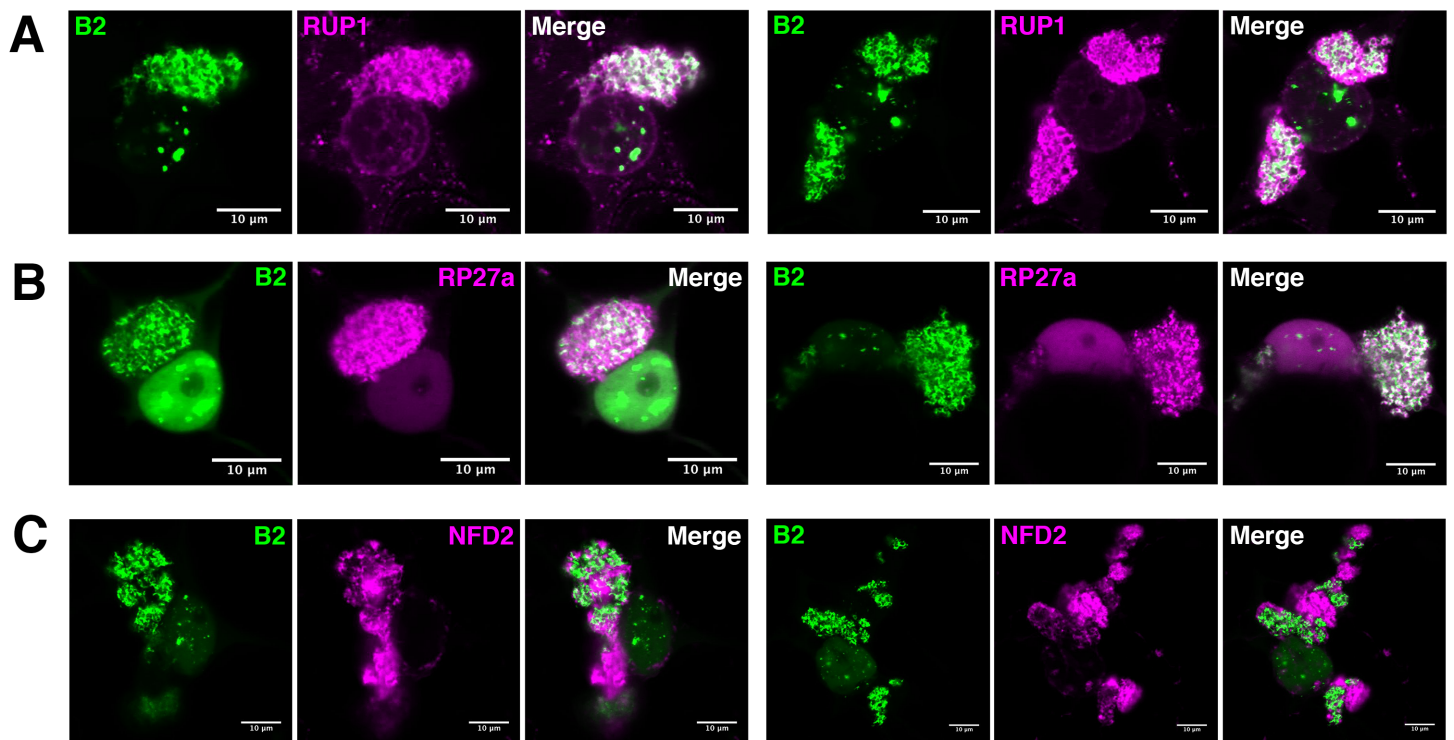

**FIGURE 7**

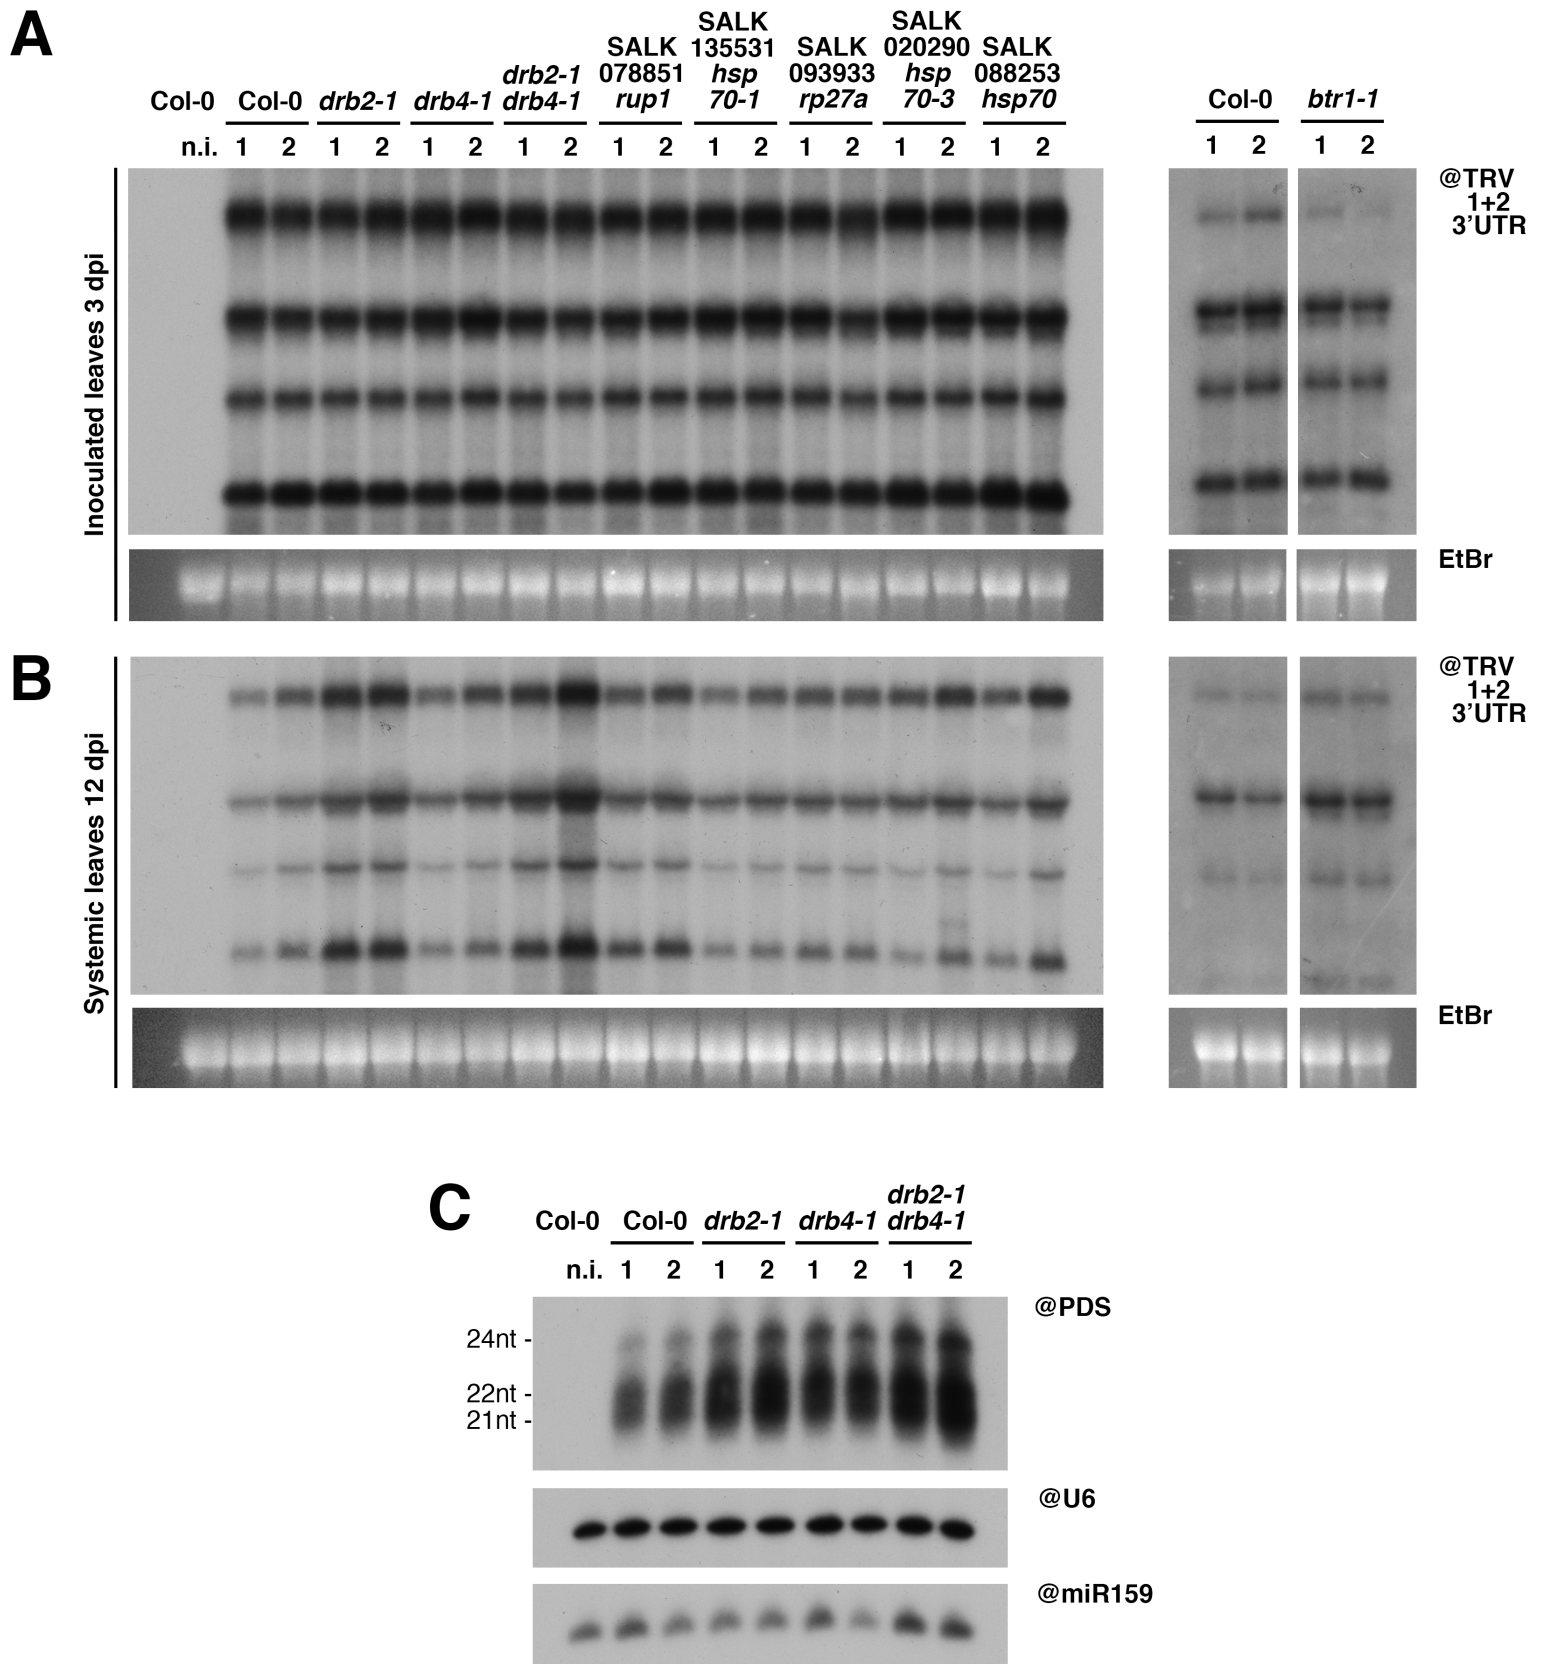

**FIGURE 8**

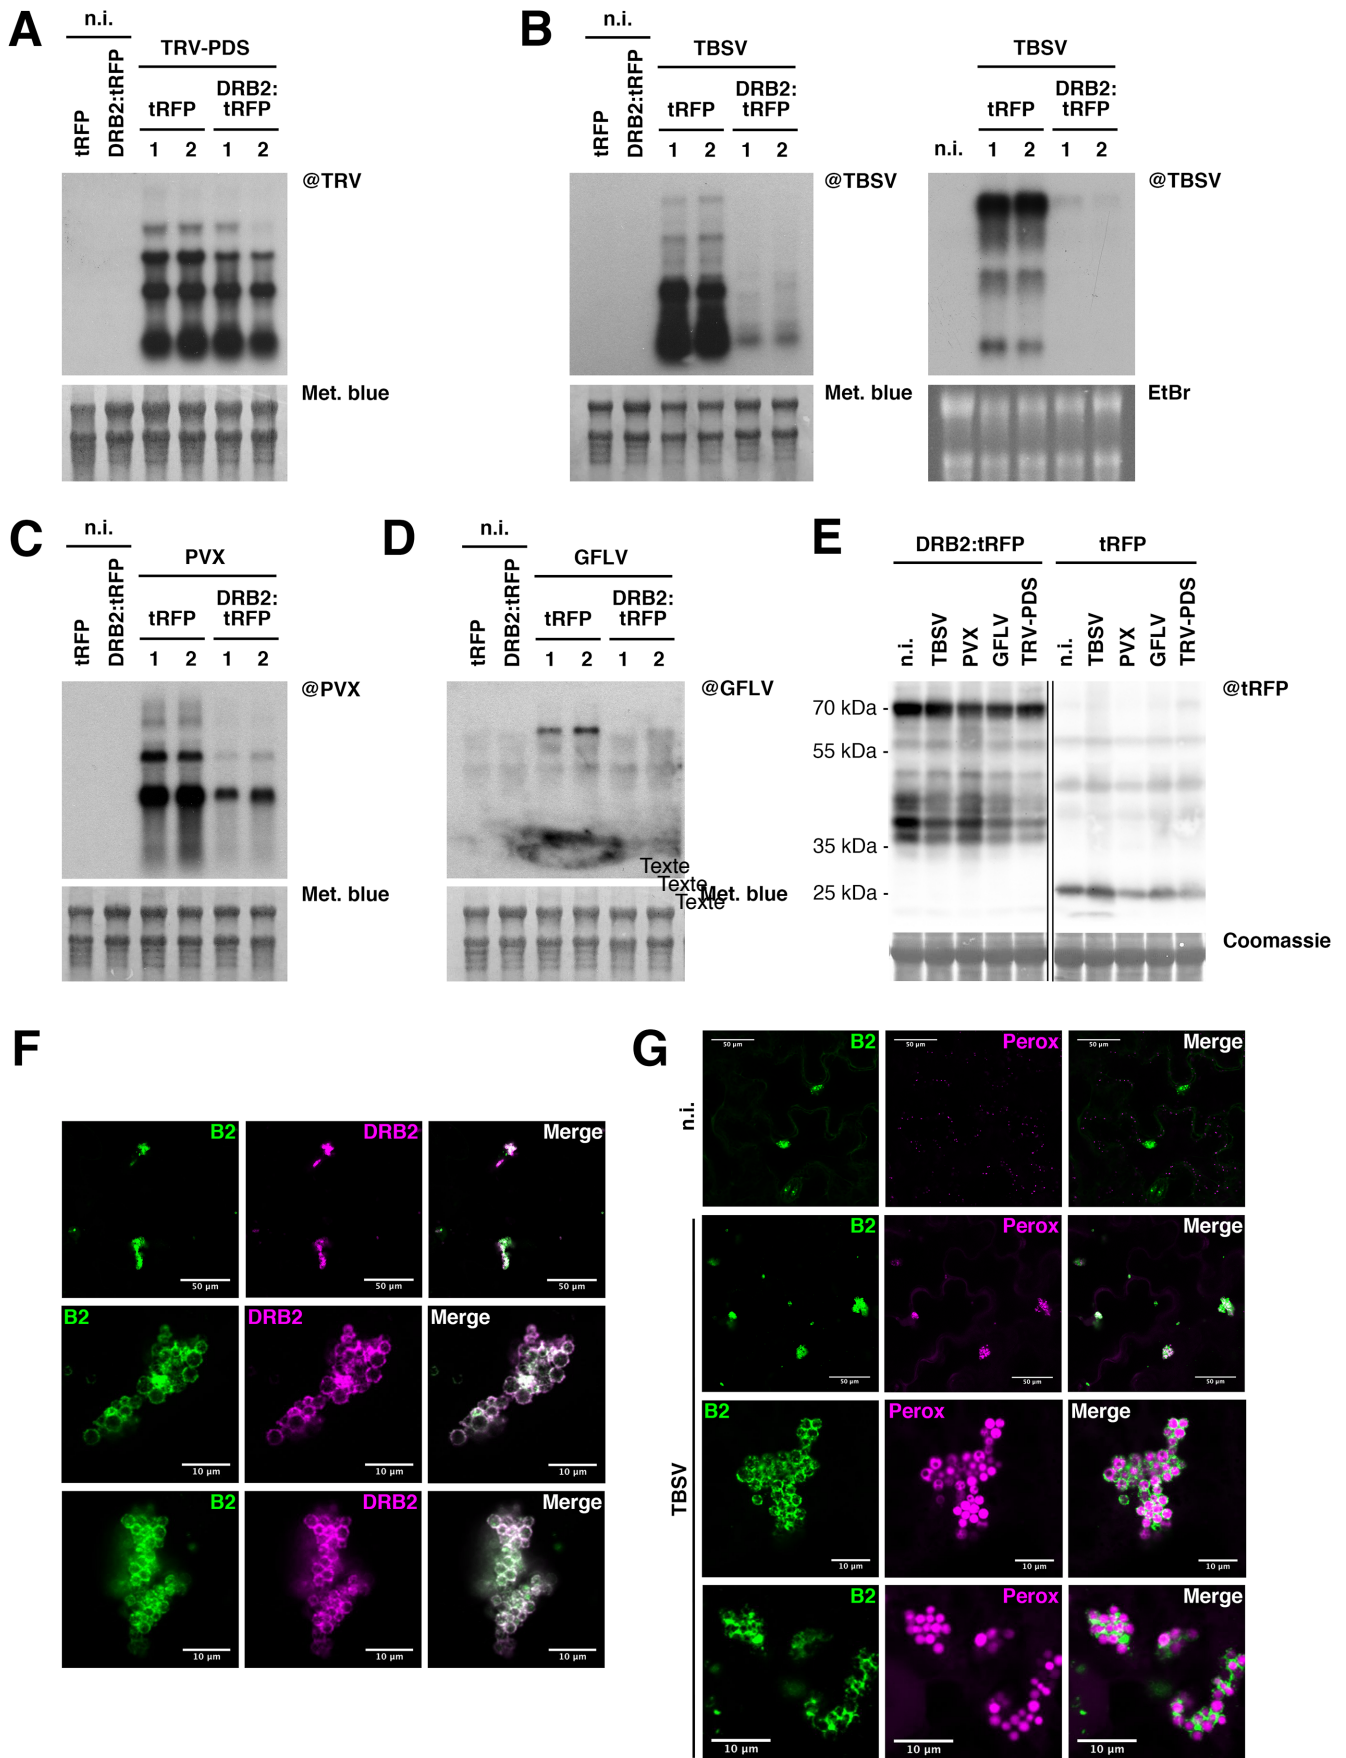

Source: https://www.biorxiv.org/content/10.1101/842666v2.full.pdf
